# Supplementary material for: The Alberta Pregnancy Outcomes and Nutrition (APrON) longitudinal study: cohort profile and key findings from the first three years
Source: PubMed Central journal article supplement — BMJ Open. 2022 Feb 7;12(2):e047503. doi: 10.1136/bmjopen-2020-047503 (PMC8823238; doi:10.1136/bmjopen-2020-047503), 2022-02-07
Supplement: bmjopen-2020-047503.draft_revisions.pdf [file bmjopen-2020-047503.draft_revisions.pdf]

# BMJ Open

BMJ Open is committed to open peer review. As part of this commitment we make the peer review history of every article we publish publicly available.

When an article is published we post the peer reviewers' comments and the authors' responses online. We also post the versions of the paper that were used during peer review. These are the versions that the peer review comments apply to.

The versions of the paper that follow are the versions that were submitted during the peer review process. They are not the versions of record or the final published versions. They should not be cited or distributed as the published version of this manuscript.

BMJ Open is an open access journal and the full, final, typeset and author-corrected version of record of the manuscript is available on our site with no access controls, subscription charges or pay-per-view fees (<http://bmjopen.bmj.com>).

If you have any questions on BMJ Open's open peer review process please email [info.bmjopen@bmj.com](mailto:info.bmjopen@bmj.com)

# BMJ Open

## Cohort Profile: The Alberta Pregnancy Outcomes and Nutrition Cohort Study

|                               |                                                                                                                                                                                                                                                                                                                                                                                                                                                                                                                                                                                                                                                                                                                                                                                                                          |
|-------------------------------|--------------------------------------------------------------------------------------------------------------------------------------------------------------------------------------------------------------------------------------------------------------------------------------------------------------------------------------------------------------------------------------------------------------------------------------------------------------------------------------------------------------------------------------------------------------------------------------------------------------------------------------------------------------------------------------------------------------------------------------------------------------------------------------------------------------------------|
| Journal:                      | <i>BMJ Open</i>                                                                                                                                                                                                                                                                                                                                                                                                                                                                                                                                                                                                                                                                                                                                                                                                          |
| Manuscript ID                 | bmjopen-2020-047503                                                                                                                                                                                                                                                                                                                                                                                                                                                                                                                                                                                                                                                                                                                                                                                                      |
| Article Type:                 | Cohort profile                                                                                                                                                                                                                                                                                                                                                                                                                                                                                                                                                                                                                                                                                                                                                                                                           |
| Date Submitted by the Author: | 11-Dec-2020                                                                                                                                                                                                                                                                                                                                                                                                                                                                                                                                                                                                                                                                                                                                                                                                              |
| Complete List of Authors:     | <p>Letourneau, Nicole; University of Calgary, Faculty of Nursing; University of Calgary Cumming School of Medicine, Pediatrics, Psychiatry and Community Health Sciences</p> <p>Ali, Elena; University of Calgary</p> <p>Aghajafari, Fariba; University of Calgary, Family Medicine</p> <p>Bell, R; University of Alberta, Agricultural, Food and Nutritional Science; University of Alberta</p> <p>Deane, Andrea</p> <p>Dewey, Deborah ; University of Calgary, Paediatrics and Community Health Sciences</p> <p>Field, Catherine; University of Alberta, Department of Agricultural, Food and Nutritional Science;</p> <p>Giesbrecht, Gerald ; University of Calgary,</p> <p>Kaplan, Bonnie; University of Calgary Cumming School of Medicine, ;</p> <p>Leung, Brenda; University of Calgary,</p> <p>Ntanda, Henry</p> |
| Keywords:                     | NUTRITION & DIETETICS, MENTAL HEALTH, PAEDIATRICS, PUBLIC HEALTH                                                                                                                                                                                                                                                                                                                                                                                                                                                                                                                                                                                                                                                                                                                                                         |
|                               |                                                                                                                                                                                                                                                                                                                                                                                                                                                                                                                                                                                                                                                                                                                                                                                                                          |

SCHOLARONE™  
Manuscripts

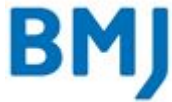

I, the Submitting Author has the right to grant and does grant on behalf of all authors of the Work (as defined in the below author licence), an exclusive licence and/or a non-exclusive licence for contributions from authors who are: i) UK Crown employees; ii) where BMJ has agreed a CC-BY licence shall apply, and/or iii) in accordance with the terms applicable for US Federal Government officers or employees acting as part of their official duties; on a worldwide, perpetual, irrevocable, royalty-free basis to BMJ Publishing Group Ltd ("BMJ") its licensees and where the relevant Journal is co-owned by BMJ to the co-owners of the Journal, to publish the Work in this journal and any other BMJ products and to exploit all rights, as set out in our [licence](#).

The Submitting Author accepts and understands that any supply made under these terms is made by BMJ to the Submitting Author unless you are acting as an employee on behalf of your employer or a postgraduate student of an affiliated institution which is paying any applicable article publishing charge ("APC") for Open Access articles. Where the Submitting Author wishes to make the Work available on an Open Access basis (and intends to pay the relevant APC), the terms of reuse of such Open Access shall be governed by a Creative Commons licence – details of these licences and which [Creative Commons](#) licence will apply to this Work are set out in our licence referred to above.

Other than as permitted in any relevant BMJ Author's Self Archiving Policies, I confirm this Work has not been accepted for publication elsewhere, is not being considered for publication elsewhere and does not duplicate material already published. I confirm all authors consent to publication of this Work and authorise the granting of this licence.

Cohort Profile: The Alberta Pregnancy Outcomes and Nutrition Cohort Study

**Authors:** Nicole Letourneau<sup>1,2</sup>, Elena Ali<sup>1</sup>, Fariba Aghajafari<sup>3</sup>, Rhonda Bell<sup>4</sup>, Andrea Deane<sup>5</sup>, Deborah Dewey<sup>6</sup>, Catherine Field<sup>4</sup>, Gerald Giesbrecht<sup>7</sup>, Bonnie Kaplan<sup>7</sup>, Brenda Leung<sup>8</sup>, Henry Ntanda<sup>5</sup>, & APrON Study Team

**Author affiliations:** <sup>1</sup> Faculty of Nursing, University of Calgary, Calgary, AB, Canada; <sup>2</sup> Cumming School of Medicine (Paediatrics, Psychiatry & Community Health Sciences), University of Calgary, Calgary, AB, Canada; <sup>3</sup> Cumming School of Medicine (Family Medicine & Community Health Sciences), University of Calgary, Calgary, AB, Canada; <sup>4</sup> Faculty of Agricultural, Life & Environmental Sciences, University of Alberta, Edmonton, AB, Canada; <sup>5</sup> Cumming School of Medicine, University of Calgary, Calgary, AB, Canada; <sup>6</sup> Cumming School of Medicine (Paediatrics), University of Calgary, Calgary, AB, Canada; <sup>7</sup> Cumming School of Medicine (Paediatrics & Community Health Sciences), University of Calgary, Calgary, AB, Canada; <sup>8</sup> University of Lethbridge (Health Science – Public Health Program), University of Lethbridge, Lethbridge, AB, Canada

**Corresponding author:**

Nicole Letourneau

Faculty of Nursing

Cumming School of Medicine (Paediatrics, Psychiatry & Community Health Sciences)

University of Calgary

2500 University Drive NW

Calgary, AB

T2N 1N4

Telephone: (403) 210-3833

E-mail: [nicole.letourneau@ucalgary.ca](mailto:nicole.letourneau@ucalgary.ca)

1  
2  
3 **Word count:** 3115 words  
4

5 **Keywords:** Nutrition & dietetics, mental health, paediatrics, public health  
6

7  
8 **Funding**  
9

10 This work was supported by the Canadian Institutes of Health Research Doctoral Award (CIHR,  
11  
12 grant number 394652).  
13

14  
15 **Acknowledgements**  
16

17 The authors acknowledge the contributions of all the families who took part in the APrON study,  
18  
19 and the investigators, managers, research assistants, graduate and undergraduate students,  
20  
21 volunteers and clerical staff of the APrON study team.  
22

23  
24 **Conflict of Interest**  
25

26 None declared.  
27  
28  
29  
30  
31  
32  
33  
34  
35  
36  
37  
38  
39  
40  
41  
42  
43  
44  
45  
46  
47  
48  
49  
50  
51  
52  
53  
54  
55  
56  
57  
58  
59  
60

## Cohort Profile: The Alberta Pregnancy Outcomes and Nutrition Cohort Study

### ABSTRACT

**Purpose:** The purposes of the Alberta Pregnancy Outcomes and Nutrition (APrON) study were: to determine the relationship between maternal nutrient intake and status before, during, and after pregnancy, and (a) maternal mental health, (b) pregnancy and birth outcomes, and (c) infant neurodevelopment; to examine the relationship between maternal thyroid status and neonatal outcomes, and to establish nutrient predictors of infant behavioral patterns; and to establish a DNA biobank to examine the influence of nutritional genomics on children neurodevelopment and behavioral patterns.

**Participants:** APrON is an ongoing prospective transgenerational cohort study consisting of participants who reside in Calgary and Edmonton, Alberta, Canada. Data comprise of: self-completed mother, father, and child questionnaires; maternal and paternal dietary interviews; clinical assessments; linkage to hospital obstetrical records; and biological samples. DNA samples were banked for future studies of nutrient/gene and genetic links to infant development.

**Findings to date:** Key findings pertaining to mental health and nutrition outcomes are presented. Specifically, risk factors for depressive symptoms and the positive association between maternal exposure to adverse childhood experiences and prenatal depression and anxiety are discussed. The consumption of specific food groups that is associated with meeting choline adequate intake recommendations is discussed, along with findings pertaining to mothers' gestational weight gain and reported dietary Vitamin D intake.

**Future plans:** The APrON cohort offers a unique opportunity to follow a group of Canadian children to advance understanding of the fetal origins of diseases. The APrON study aspires to transition to an intergenerational study in order to investigate current child participants in

1  
2  
3 adulthood. Accordingly, the APrON study will use a detailed array of standardized validated  
4  
5 psychological and physiological measures and biospecimens to collect detailed information on  
6  
7 maternal nutrition during pregnancy and maternal and paternal perinatal mental health.  
8  
9

### 10 **ARTICLE SUMMARY**

- 13 • The APrON study used a detailed array of standardized validated psychological and  
14  
15 physiological measures and biospecimens. The prospective data collection and follow-up  
16  
17 enabled investigation of a wide range of maternal and paternal health outcomes.  
18  
19
- 20 • The APrON team has been successful in continuously engaging participants, as evidenced  
21  
22 by high response rates during pregnancy, postpartum and early childhood.  
23  
24
- 25 • One limitation is that the sample characteristics are skewed toward a high percentage of  
26  
27 white, well-educated and married participants. Consequently, generalizability of findings  
28  
29 to those with different socio-demographic backgrounds should be made with caution.  
30  
31
- 32 • Another limitation is that selective attrition bias has likely occurred, which may lead to  
33  
34 underestimation of the effect of parental mental health and lifestyle choices on the child's  
35  
36 development.  
37  
38

### 39 **INTRODUCTION**

40  
41 The Alberta Pregnancy Outcomes and Nutrition (APrON) study is a longitudinal cohort of  
42  
43 pregnant women, their partners<sup>1</sup>, and children in Alberta, Canada. The APrON study was  
44  
45 designed to investigate the effect of nutrient intake and status during pregnancy on maternal  
46  
47 mental health and children's neurodevelopment [1, 2]. The original grant of \$5 million provided  
48  
49 the foundation for the APrON study, which has expanded its focus and contributed to over 50  
50  
51  
52  
53  
54

---

55 <sup>1</sup> Mothers in our study are biological mothers. Fathers self-identified as fathers of their children, whether biological  
56  
57 or not.  
58  
59  
60

1  
2  
3 additional projects on the psychobiology of stress, parent-child relationships and attachment,  
4 neurotoxicant exposure, genetics, epigenetics, inflammation, and immune activity, probiotics, the  
5 microbiome and children's brain development. To date, the APrON study has received over \$14  
6 million in additional funding. This funding enabled follow-up of APrON families to when  
7 children reach age 12 to address the impact of medical, biological, and environmental factors on  
8 children's development, behavior and mental health [3]. Data collection for the five-year follow-  
9 up questionnaire is complete, eight-year follow-up is ongoing and a 12-year follow-up will start  
10 in 2021. The objective of this paper is to describe key findings on maternal and paternal mental  
11 health outcomes and maternal nutrient intake and status of APrON participants from pregnancy to  
12 three years after delivery.  
13  
14  
15  
16  
17  
18  
19  
20  
21  
22  
23  
24  
25

### 26 **COHORT DESCRIPTION**

27  
28 Women were recruited into the cohort if they were 16 years of age or older, able to speak  
29 and read English, < 27 weeks gestation and willing to come for on-site visits at the University of  
30 Calgary, Calgary or University of Alberta, Edmonton, Alberta. Men were eligible if they were  
31 cohabitating with the participating woman. Participants were excluded if they planned to move  
32 out of the region during the on-site visit timeframe (pregnancy to 3 months postpartum) of the  
33 study. A total of 2189 pregnant women (aged 16 to 44) and 1325 men (aged 18 to 52), residing  
34 around Calgary or Edmonton, were enrolled in the study between May 2009 and June 2012. The  
35 APrON study was approved by the University of Calgary Health Research Ethics Board (REB14-  
36 1702) and University of Alberta Health Research Ethics Biomedical Panel (00002954). Full  
37 details on how women and their partners were recruited are provided by Kaplan et al. (2014) and  
38 in previous publications describing the APrON cohort [4, 5]. To assess the representativeness of  
39 the APrON cohort (see Table 1), socio-demographic characteristics of participants at the time of  
40  
41  
42  
43  
44  
45  
46  
47  
48  
49  
50  
51  
52  
53  
54  
55  
56  
57  
58  
59  
60



recruitment were compared to characteristics of women with children in Calgary, Alberta, and

| Category                                  | Maternal (n / %) | Paternal (n / %) |
|-------------------------------------------|------------------|------------------|
| Demographics                              |                  |                  |
| Age (years)                               |                  |                  |
| 16 – 24                                   | 100 (4.6)        | 19 (1.4)         |
| 25 – 29                                   | 481 (22.0)       | 216 (15.4)       |
| 30 -34                                    | 980 (44.78)      | 493 (35.2)       |
| 35 -39                                    | 512 (23.4)       | 329 (23.5)       |
| ≥ 40                                      | 105 (4.8)        | 162 (11.6)       |
| Missing age information                   | 11 (0.5)         | 181 (12.9)       |
| Marital status                            |                  |                  |
| Married/common-law                        | 2035 (93.0)      | 1275 (91.1)      |
| Single/divorced/separated                 | 97 (4.4)         | 27 (1.9)         |
| Missing marital information               | 57 (2.6)         | 98 (7.0)         |
| Education                                 |                  |                  |
| Less than a high school diploma           | 59 (2.7)         | 31 (2.2)         |
| Completed high school diploma             | 202 (9.2)        | 147 (10.5)       |
| Completed trade, technical                | 404 (18.5)       | 376 (26.9)       |
| Completed university or more              | 1442 (66.8)      | 746 (53.3)       |
| Missing education information             | 83 (3.7)         | 100 (7.1)        |
| Ethnicity                                 |                  |                  |
| White                                     | 1693 (77.3)      | 1082 (77.3)      |
| Non-white                                 | 485 (22.2)       | 206 (14.7)       |
| Missing ethnic information                | 11 (0.5)         | 112 (8.0)        |
| Mothers' Report on total household income |                  |                  |
| < \$40,000                                | 190 (8.7)        | -                |
| \$40,000 - \$69,999                       | 279 (12.7)       | -                |
| \$70,000 - \$99,999                       | 464(21.2)        | -                |
| >\$100,000                                | 1146 (52.3)      | -                |
| Missing household income information      | 110 (5.0)        | -                |
| Born in Canada                            |                  |                  |
| Yes                                       | 1618 (73.9)      | 1024 (73.1)      |
| No                                        | 481 (22.0)       | 277 (19.8)       |
| Missing country of birth                  | 90 (4.1)         | 99 (7.1)         |
| Gravidity                                 |                  |                  |
| Multigravida                              | 1107 (51.6)      | n/a              |
| Primigravida                              | 996 (46.4)       | n/a              |
| Missing gravidity information             | 42 (2.0)         | n/a              |
| Parity                                    |                  |                  |
| 0                                         | 1222 (55.8)      | n/a              |
| 1                                         | 732 (33.4)       | n/a              |

Canada [3, 5, 6].

|                            |           |     |
|----------------------------|-----------|-----|
| 2                          | 181 (8.3) | n/a |
| ≥3                         | 37 (1.7)  | n/a |
| Missing parity information | 17 (0.8)  | n/a |

Table 1. *Participant Intake Characteristics (N = 3514)*

A greater proportion of women in the cohort (28.0%) were over 34 years old compared with women in Calgary (20.0%), Alberta (16.0%), and Canada (18.0%). More APrON women were married (95%) compared with women in Calgary (73.0%), Alberta (70.0%), and Canada (60.0%). A greater proportion of women had household income of \$70,000 or more (77.0%) compared to Calgary (65.0%), Alberta (61.0%), and Canada (58.0%). More APrON women completed post-secondary education (87.0%) compared to women in Calgary (69.0%), Alberta (70.0%), and Canada (72.0%). The proportion of APrON women who were born outside of Canada (23.0%) was similar to the proportions in Calgary (25.0%), Alberta (22%), and Canada (20.0%) (Figure 1).

### How Often Have They Been Followed Up?

Between 2009 and 2012 the initial cohort completed questionnaires and clinical assessments three times during pregnancy, and at 3 months postpartum. Follow-up questionnaires were provided when their child was 6 months, and 1-, 2- and 3- years of age (see Figure 2).

In total, 2189 women and 1325 men completed at least one questionnaire. Of these, 1945 (88.8%), are continuing participants, who were defined as those who did not become ineligible or lost to follow-up. Participants who discontinued the study included women who miscarried, had a stillbirth, lost custody of their child, or for whom a maternal/child death was reported ( $n = 52$ , 2.4%); moved out of Calgary or Edmonton before three months postpartum ( $n = 43$ , 2.0%); or withdrew from the study citing loss of interest ( $n = 147$ ; 6.7%). The demographic characteristics

of participants who continued in APrON compared with those that discontinued are provided in

Table 2.

Table 2. Comparison of Demographic Characteristics of Continuing and Discontinued Participants

| Characteristic                     | Continuing participants<br>n (%) | Discontinuing participants |                            |                      | P-value* |
|------------------------------------|----------------------------------|----------------------------|----------------------------|----------------------|----------|
|                                    |                                  | Become ineligible<br>n (%) | Lost to follow-up<br>n (%) | Dropped out<br>n (%) |          |
| <b>Maternal age</b>                |                                  |                            |                            |                      |          |
| 16 – 24                            | 71 (3.6)                         | 8 (18.6)                   | 15 (34.8)                  | 6 (4.1)              | < 0.001  |
| 25 – 29                            | 424 (16.2)                       | 7 (16.2)                   | 7 (16.2)                   | 43 (29.2)            |          |
| 30 – 34                            | 899 (46.2)                       | 15 (34.8)                  | 14 (32.5)                  | 51 (34.7)            |          |
| 35 – 39                            | 454 (23.3)                       | 9 (20.9)                   | 7 (16.2)                   | 41 (27.9)            |          |
| ≥40                                | 95 (4.8)                         | 4 (9.3)                    | 0 (0.0)                    | 6 (4.1)              |          |
| <b>Marital status</b>              |                                  |                            |                            |                      |          |
| Single                             | 72 (3.8)                         | 12 (24.5)                  | 8 (21.1)                   | 5 (3.8)              | 0.007    |
| Married                            | 1838 (96.2)                      | 37 (75.5)                  | 30 (78.9)                  | 128 (96.2)           |          |
| <b>Maternal education</b>          |                                  |                            |                            |                      |          |
| Less than a high school diploma    | 41 (2.2)                         | 6 (16.2)                   | 8 (20.5)                   | 4 (3.01)             | <0.001   |
| Completed high school diploma      | 164 (8.6)                        | 9 (24.3)                   | 9 (23.1)                   | 20 (15.0)            |          |
| Completed trade, technical diploma | 362 (19.1)                       | 5 (13.5)                   | 10 (25.6)                  | 26 (19.5)            |          |
| Completed university or more       | 1329 (70.1)                      | 17 (45.9)                  | 12 (30.6)                  | 83 (62.4)            |          |
| <b>Household income</b>            |                                  |                            |                            |                      |          |
| < \$40,000                         | 151 (8.1)                        | 12 (30.8)                  | 19 (54.3)                  | 8 (6.15)             | <0.001   |
| \$40,000-                          | 252 (13.4)                       | 6 (15.4)                   | 5 (14.3)                   | 16 (12.31)           |          |
| \$60,000                           | 428 (22.8)                       | 7 (17.9)                   | 4 (11.4)                   | 24 (18.46)           |          |
| \$70,000-                          | 1042 (55.6)                      | 14 (35.9)                  | 7 (20.0)                   | 82 (63.08)           |          |
| \$99,999                           |                                  |                            |                            |                      |          |
| ≥ \$100,000                        |                                  |                            |                            |                      |          |
| <b>Born in Canada</b>              |                                  |                            |                            |                      |          |

|     |             |           |           |            |       |
|-----|-------------|-----------|-----------|------------|-------|
| No  | 425 (22.5)  | 13 (32.5) | 14(37.8)  | 28 (21.2)  | 0.186 |
| Yes | 1463 (77.5) | 27 (67.5) | 23 (62.2) | 104 (78.8) |       |

*Note.* Assessing the null hypothesis that there is no difference in distributions between those participants who continued and those who did not continue in the study; chi-square test

Continuing participants were more likely older, married, and had higher education and household income (all  $ps < 0.05$ ). The proportion of continuing participants born in Canada was similar to discontinuing participants. When mothers were lost to follow-up, so too were fathers and children.

### What Has Been Measured?

Women were asked to complete questionnaires three times during pregnancy (<14, 14-26, and 27-40 weeks gestation, number of scales administered at this time was 37) and six times postnatally (3 and 6 months, 1, 2, 3, and 5 years, number of scales administered at this time was 65). Fathers were asked to complete questionnaires when the women were 14-26 weeks gestational age (number of scales administered at this time was 16), and twice postnatally (3 months and 5 years, number of scales administered at this time were 14). Questionnaires administered during pregnancy measured previous and current mental and physical health status, nutritional, medication and supplement intake, lifestyle choices, healthcare services used, social support, attitudes towards breastfeeding, and sociodemographic variables. The follow-up postpartum questionnaires collected information about labor and delivery; postpartum medical problems; maternal mental health; nutritional, medication and supplement intake; lifestyle choices; food security; and socio-demographics (see Figure 2). A detailed list of data collected, including measures used if applicable, is provided in Table 3.1 for mothers and Table 3.2 for fathers.

Table 3.1. *Maternal Variables and Biological Specimens Collected in All Questionnaires and Clinical Visits*

| Variables                                  | <14 weeks | 14-26 weeks | 27-40 weeks | 3 months postpartum | 6 months postpartum | 1 year | 2 years | 3 years |
|--------------------------------------------|-----------|-------------|-------------|---------------------|---------------------|--------|---------|---------|
| <b>Socio-demographics</b>                  |           |             |             |                     |                     |        |         |         |
| Household income                           | X         |             |             |                     |                     |        |         |         |
| Education                                  | X         |             |             |                     |                     |        |         |         |
| Marital status                             | X         |             |             |                     |                     |        |         |         |
| Age                                        | X         |             |             |                     |                     |        |         |         |
| Primary language                           | X         |             |             |                     |                     |        |         |         |
| Born in Canada                             | X         |             |             |                     |                     |        |         |         |
| Family background                          |           | X           | X           | X                   | X                   | X      | X       | X       |
| Family history                             |           | X           |             |                     |                     |        |         |         |
| <b>Health and lifestyle</b>                |           |             |             |                     |                     |        |         |         |
| General health                             |           |             |             | SF-8                | SF-8                | SF-8   | SF-8    | SF-8    |
| Current medical conditions and medications | X         | X           | X           | X                   | X                   | X      | X       | X       |
| Substance use                              | X         | X           | X           | X                   | X                   | X      | X       | X       |
| Pregnancy history                          |           |             |             |                     |                     |        |         |         |
| Pre-pregnancy physical activity            | X         | X           | X           | X                   | X                   | X      | X       | X       |
| Physical activity                          | GLTE      | GLTE        | GLTE        | GLTE                | GLTE                | GLTE   | GLTE    | GLTE    |
| Dental care                                | X         | X           | X           |                     |                     |        |         |         |
| Dietary changes since pregnancy            | X         |             |             |                     |                     |        |         |         |
| Food security                              |           |             | CCHSC       |                     | CCHSC               |        |         |         |
| Nutrition counselling information          |           |             |             | X                   |                     |        |         |         |
| Diet history pre-pregnancy                 |           | FFQ         |             |                     |                     |        |         |         |
| Nausea and vomiting                        | PUQUE     | PUQUE       | PUQUE       |                     |                     |        |         |         |
| Breastfeeding information                  |           |             |             | X                   | X                   | X      | X       | X       |
| 24-hour recall of foods consumed           | X         | X           | X           | X                   | X                   | X      | X       | X       |
| <b>Psychosocial health</b>                 |           |             |             |                     |                     |        |         |         |
| Depression                                 | EDS       | EDS         | EDS         | EDS                 | EDS                 | EDS    | EDS     | EDS     |
| Stress                                     | SLEQ      |             | SLEQ        | SLEQ                |                     | SLEQ   | SLEQ    | SLEQ    |
| Social support                             | SSQ       | SSQ         | SSQ         | SSQ                 | SSQ                 | SSQ    | SSQ     | SSQ     |

| DSM-IV Axis I disorders             | SCL-90-R | PDSQ<br>SCL-90-R | SCL-90-R | PDSQ<br>SCL-90-R | SCL-90-R | SCL-90-R | SCL-90-R | SCL-90-R |
|-------------------------------------|----------|------------------|----------|------------------|----------|----------|----------|----------|
| Anxiety                             | ACEs     |                  |          |                  |          |          |          |          |
| Adverse childhood events            | X        | X                | X        | X                |          | X        | X        | X        |
| History of mental health            |          | X                | X        |                  |          |          |          |          |
| Anthropometrics (BMI/height/weight) |          |                  |          |                  |          |          |          |          |
| <b>Biological specimens</b>         |          |                  |          |                  |          |          |          |          |
| Urine                               |          | X                |          | X                |          |          |          |          |
| Venous blood                        | X        | X                | X        | X                |          |          |          |          |
| Breast milk                         |          |                  |          | X                |          |          |          |          |

*Note.* X refers to investigator-developed measures. SCL-90-R, Symptom Checklist-90-Revised; EDS, Edinburgh Depression Scale; PUQE, Pregnancy-Unique Quantification of Emesis and Nausea questionnaire; SLEQ, Stressful Life Events Questionnaire ; SSQ, Social Support Questionnaire; PDSQ, Psychiatric Diagnostic Screening Questionnaire; ACEs, Adverse Childhood Experiences Questionnaire; SF-8, Short Form Health Survey-8; CCHSC, Canadian Community Health Survey Cycle 2.2, modified; GLTE, Godin Leisure-Time Exercise Questionnaire; FFQ, Food Frequency Questionnaire, adapted from the Canadian version of the Diet History Questionnaire.\*Breastfeeding mothers only.

Table 3.2. *Paternal Variables and Biological Specimens Collected in All Questionnaires and Clinical Visits*

| Variables                                             | <14 weeks gestation | 14-26 weeks | 27-40 weeks | 3 months postpartum |
|-------------------------------------------------------|---------------------|-------------|-------------|---------------------|
| <b>Socio-demographics</b>                             |                     |             |             |                     |
| Household income                                      |                     |             | X           |                     |
| Education                                             |                     |             | X           |                     |
| Marital status                                        |                     |             | X           |                     |
| Age                                                   |                     |             | X           |                     |
| Primary language                                      |                     |             | X           |                     |
| Born in Canada                                        |                     |             | X           |                     |
| Family background                                     |                     |             | X           |                     |
| Family history*                                       |                     |             | X           |                     |
| <b>Health and lifestyle</b>                           |                     |             |             |                     |
| General health                                        |                     | X           | X           |                     |
| Current medical conditions and medications            |                     | X           | X           | X                   |
| Substance use                                         |                     | X           | X           | X                   |
| Physical Activity Anthropometrics (BMI/height/weight) |                     | GLTE<br>X   | GLTE<br>X   | GLTE<br>X           |
| <b>Psychosocial health</b>                            |                     |             |             |                     |
| Depression                                            |                     | EDS         | EDS         | EDS                 |
| Social support                                        |                     | SSQ         | SSQ         | SSQ                 |
| Stress                                                |                     |             | SLEQ        |                     |
| <b>Biological specimens*</b>                          |                     |             |             |                     |
| Buccal cell swab                                      |                     |             | X           |                     |
| DNA from blood                                        |                     |             | X           |                     |

Maternal anthropometric measurements were collected at each visit during pregnancy and three months postpartum. These measures included height, pre-pregnancy and current weight, highest weight during pregnancy; circumference measurements (i.e., mid-upper arm, waist, hip, thigh); and skinfold thickness (i.e., biceps, triceps, subscapular, suprailiac, thigh). Each measurement was taken three times and averages were reported for analyses. Paternal height and weight were collected during the prenatal period. One objective of APrON was to establish a biobank for future research that would allow investigation on genetics, epigenetics [1], nutrient exposures and neurotoxicants. Maternal non-fasting venous blood samples were collected from

1  
2  
3 mothers at <14, 14-26, and 27-40 weeks gestation, and at three months postpartum. Maternal  
4  
5 blood collection provided whole blood, plasma, and serum, which were used for DNA, RNA,  
6  
7 cytokines, hematocrit, hemoglobin measures, thyroid hormones and measures of heavy metal  
8  
9 (e.g., mercury, lead) and perfluorinated chemical exposure. Buccal cell samples were also  
10  
11 collected at 14-26 weeks gestation from fathers for DNA extraction and future genetic and  
12  
13 epigenetic studies. Purified DNA is available at the Gene Expression Omnibus data repository  
14  
15 (<https://www.ncbi.nlm.nih.gov/geo/>). Midstream random urine samples (10 mL) were collected  
16  
17 from expectant mothers at 14-26 weeks gestation and three months postpartum. Samples have  
18  
19 been used in the Neurotoxicant study (  $N = 546$ ) to examine maternal exposure to endocrine-  
20  
21 disrupting hormones [2]. A breast milk sample was collected from breastfeeding mothers to  
22  
23 determine fatty acids composition.  
24  
25  
26  
27

### 28 **Patient and Public Involvement**

29  
30  
31 There is an APrON Patient Engagement committee, who advises on research directions, but  
32  
33 not design. Findings have been disseminated to participants through newsletters and an online  
34  
35 conference.  
36

### 37 **FINDINGS TO DATE**

38  
39  
40 A complete list of publications from APrON can be found at  
41  
42 <http://www.apronstudy.ca/research/publications-and-press>. Key findings on maternal and paternal  
43  
44 mental health and maternal nutrition outcomes have been summarized in Box 1.  
45  
46  
47  
48  
49  
50  
51  
52  
53  
54  
55  
56  
57  
58  
59  
60



## Box 1 Key findings

**Mental health outcomes**

- In partnered couples, both mothers and fathers had depressive symptoms in 2.3% ( $n = 19$ ) of couples. Low household income and prenatal maternal depression were associated with a higher probability of depressive symptoms in both partners. In 78.5% ( $n = 664$ ) of couples, neither father nor mother experienced depressive symptoms. Postnatal social support was found to be a protective factor associated with decreased risk of maternal and paternal postpartum depressive symptoms. Risk factors for maternal postpartum depression symptoms included low household income, and prenatal EDS score  $> 10$ . For paternal postpartum depression symptoms, risk factors included low household income, prenatal EDS score of  $> 9$ , postpartum stressful life events, and smoking.
- Women with EDS score of  $< 10$  were more likely to take micronutrients (e.g., vitamins B6, B9, B12, and E; essential fatty acids; selenium) compared to women with EDS score of  $< 10$ .
- One hundred and twenty-two women (13.4 %) had a score of 3 or more ACEs. Maternal exposure to ACEs was positively associated with both prenatal depression and anxiety.

**Nutrition outcomes**

- Approximately 70% of women who enter pregnancy with a body mass index (BMI)  $> 25$  kg/m<sup>2</sup> were likely to exceed GWG guidelines in the beginning of the second trimester. Women with excessive weight gain also gained higher amounts of body fat and retain higher amounts of fat compared to women who gain within the guidelines. Women who consumed a healthy diet pattern prior to pregnancy were less likely to develop complications such as gestational hypertension.
- The median vitamin D intake from diet and supplements was 600 IU/day during pregnancy, which was not enough to achieve a target circulation 25(OH)D concentration. A significant relationship between maternal reported dietary vitamin D intake and plasma 25(OH)D and 3-epi-25(OH)D3 concentration were identified.
- Only 23% ( $n = 138$ ) of mothers met the adequate intake (AI) recommendations for choline; the number was even lower (10%) in the postpartum period. Consuming eggs and milk during pregnancy increased mothers' likelihood of meeting choline AI recommendations.

**Mental Health Outcomes**

Four key papers [7-10] reported on perinatal depression and anxiety prevalence and risk factors, and the impact of adverse childhood experiences (ACEs) on maternal prenatal depression and anxiety. Letourneau et al. [8] reported that 10.7% ( $n = 68$ ) of mothers experienced depressive symptoms in late pregnancy, defined as a score above the Edinburgh Depression Scale (EDS) cut-off of  $\geq 10$  for mothers [11]. Similarly, 10.7 % ( $n = 68$ ) reported depressive symptoms at 3 months postpartum (8). For fathers, cut-off of EDS  $\geq 9$  was used [12]. Nearly 14.0% of fathers ( $n = 139$ ) reported depressive symptoms in either first or second trimester, with rates going down to 9.1% (58) at 3 months postpartum (8). Leung et al. [9] examined 846 cohabitating (i.e., married

1  
2  
3 and common-law) mother-father couples, with 2.3% ( $n = 19$ ) of couples having both mothers and  
4 fathers reporting perinatal depressive symptoms. Neither mother nor father reported depressive  
5 symptoms in 78.5% ( $n = 664$ ) of couples. In 9.5% ( $n = 80$ ) of couples, only mothers experienced  
6 depressive symptoms during postpartum; similarly, in 9.8% ( $n = 83$ ) of couples only fathers  
7 reported depressive symptoms. Low household income and prenatal maternal depression were  
8 associated with a higher incidence of depressive postpartum symptoms in both mothers and  
9 fathers. Risk factors for maternal postpartum depressive symptoms included the low household  
10 income and prenatal depressive symptoms. Risk factors for paternal postpartum depressive  
11 symptoms included low household income, prenatal depressive symptoms, postpartum stressful  
12 life events, and smoking. Postpartum social support was found to be a protective factor associated  
13 with decreased risk of maternal and paternal postpartum depressive symptoms. Additionally,  
14 Leung et al. [7] found that mothers who reported no depressive symptoms during the perinatal  
15 period were more likely to take micronutrients (e.g., vitamins B6, B9, B12, and E; essential fatty  
16 acids; selenium) compared to mothers who experienced perinatal depressive symptoms.

17  
18  
19  
20  
21  
22  
23  
24  
25  
26  
27  
28  
29  
30  
31  
32  
33  
34  
35  
36  
37  
38  
39  
40  
41  
42  
43  
44  
45  
46  
47  
48  
49  
50  
51  
52  
53  
54  
55  
56  
57  
58  
59  
60

Letourneau et al. [10] reported that the higher ACEs score was positively associated with both prenatal depression and anxiety. ACEs were defined as traumatic events that include physical, sexual, and emotional abuse; household dysfunction; domestic violence; or living with an adult experiencing mental illness, substance use, or incarceration during childhood [13]. Nearly 14% ( $n = 122$ ) of women reported having experienced 3 or more ACEs (10). This finding is consistent with previous research [14] that suggest about a graded relationship between the number of ACEs and later increased risk for health issues. Routine screening for ACEs may facilitate early identification and preventative interventions; however, this has been recently debated (14). In sum, the identified risks and protective factors provide opportunities for prevention of perinatal depression and anxiety in mothers and fathers.

## Nutrition Outcomes

Gestational weight gain and dietary intake, and perinatal nutrient intake and status were examined in 8 key papers (15-18, 20-22, 26).

### Gestational Weight Gain and Dietary Intake

Gestational weight gain over or below Health Canada's Gestational Weight Gain (GWG) Guidelines is associated with an increased risk of adverse outcomes for mother and infant [15]. The APrON cohort was the first to provide evidence that more than half of women gain more than Health Canada's Guidelines, using prospectively collected body weights from across pregnancy [16]. Since then, several studies have been completed with body weight or body composition in pregnancy or postpartum as a main outcome. Analysis of the APrON data by Jarman et al. [17] provided a clear picture indicating that ~70% of women who enter pregnancy with a body mass index (BMI) > 25 kg/m<sup>2</sup> are likely to exceed GWG guidelines, by about 19 weeks gestation. Women with excessive weight gain also gain higher amounts of body fat and retain higher amounts of fat compared to women who gain within the guidelines [18]. The detailed dietary intake information that was collected showed that women who consumed a healthy diet pattern prior to pregnancy were less likely to develop complications such as gestational hypertension [19]. An individualized approach to supportive dietary counseling that considers pre-pregnancy BMI in addition to the woman's social and financial context is key to helping women meet national recommendations for both diet and GWG in pregnancy [20].

### Nutrient Intake and Status

Vitamin D is critical for a healthy pregnancy [21]. Three studies that included APrON participants examined the role of maternal vitamin D intake during pregnancy [22-24]. Aghajafari et al. [23] reported that the median vitamin D intake from diet and supplements was 600 IU/day during pregnancy, which was not sufficient to achieve a target circulation 25(OH)D

1  
2  
3 concentration. When the 3-epimer was included in the estimation of vitamin D status, the  
4 prevalence of vitamin D insufficiency (<75 nmol/L) was lower (33.0 %) compared to when it was  
5 excluded (38.0 %). Vitamin D supplementation (2000 IU/day) was associated with 25(OH)D3  
6 sufficiency [22-24]. A significant relationship between maternal reported dietary vitamin D  
7 intake and plasma 25(OH)D and 3-epi-25(OH)D3 concentration were identified.  
8  
9

10  
11  
12  
13  
14 Choline intake during pregnancy and lactation is critical to the offspring's brain function  
15 [25]. Lewis et al.[26] reported that the mean choline intake in pregnant and lactating women  
16 ranged between 340 (SD 148) in the second trimester and 346 (SD 151) mg/day at 3 months  
17 postpartum. Only 23% ( *n* = 138) of mothers met the adequate intake (AI) recommendations for  
18 choline; the number was even lower (10%) in the postpartum period [26]. Consuming eggs and  
19 milk during pregnancy increased mothers' likelihood of meeting choline AI recommendations.  
20 These findings contributed to the European Food Safety Authority (EFSA) dietary reference  
21 values for choline guidelines [27]. To conclude, a significant number of women were not meeting  
22 recommendations for vitamin D and choline intake during pregnancy and postpartum. Increased  
23 consumption of these nutrients may be necessary for pregnant and lactating women to improve  
24 the health and development of their infants.  
25  
26  
27  
28  
29  
30  
31  
32  
33  
34  
35  
36  
37  
38

### 39 40 **STRENGTHS AND WEAKNESSES**

41  
42 The major strengths of APrON are recruitment and retention of the large community-  
43 based cohort during pregnancy, postpartum and early childhood. The APrON study used a  
44 detailed array of standardized validated psychological and physiological measures and  
45 biospecimens. The prospective data collection and follow-up enabled investigation of a wide  
46 range of maternal and paternal health outcomes. The APrON team has been successful in  
47 continuously engaging participants, as evidenced by high response rates over the years (see Table  
48  
49  
50  
51  
52  
53  
54  
55  
56 4).  
57  
58  
59  
60

Table 4. *Response Rates for Questionnaires*

| <b>Data collection time point</b>                                            | Targeted participants (n) | Participants responded (n) | Response rate (%) |
|------------------------------------------------------------------------------|---------------------------|----------------------------|-------------------|
| Mothers < 14 weeks gestation                                                 | 2189                      | 2145                       | 97.9              |
| Mothers at 14-26 weeks gestation                                             |                           |                            |                   |
| Mothers at 14-26 weeks gestation and those recruited at < 14 weeks gestation | 563                       | 475                        | 84.3              |
| Fathers at 14-26 weeks gestation                                             | 1325                      | 1315                       | 99.2              |
| Mothers at 27-40 weeks gestation                                             | 1838                      | 1830                       | 99.5              |
| Mothers at 3 months postpartum                                               | 2051                      | 1811                       | 88.3              |
| Fathers at 3 months postpartum                                               | 1287                      | 1150                       | 89.3              |
| Mothers at 6 months postpartum                                               | 1727                      | 1523                       | 88.1              |
| Mothers at 1 year postpartum                                                 | 1747                      | 1305                       | 74.7              |
| Mothers at 2 year postpartum                                                 | 1809                      | 1299                       | 71.8              |
| Mothers at 3 year postpartum                                                 | 1648                      | 1282                       | 77.7              |

Limitations of this study include the sample characteristics that are skewed toward a high percentage of white, well-educated and married participants. Consequently, generalizability of findings to those with different socio-demographic backgrounds should be made with caution.

Another limitation is that selective attrition bias has likely occurred, which may lead to underestimation of the effect of parental mental health and lifestyle choices on the child's development. The study likely included participants with healthier lifestyle behaviors or with

1  
2  
3 more positive attitudes towards research, because such characteristics are associated with higher  
4 socioeconomic status [28]. The differences in the demographic characteristics of the continuing  
5 participants compared with discontinuing participants should be considered when interpreting the  
6 findings. There were also fewer fathers than mothers in the sample; thus, most developmental and  
7 behavioral outcomes were based on maternal reports.  
8  
9  
10  
11  
12  
13

## 14 FURTHER DETAILS

### 15 Collaboration

16  
17 Information about the APrON study is available at [www.apronstudy.ca](http://www.apronstudy.ca). The APrON data  
18 is available through SAGE (Secondary Evidence to Generate Evidence;  
19 <https://policywise.com/sage/>). For more information contact Dr. Nicole Letourneau at  
20 [Nicole.letourneau@ucalgary.ca](mailto:Nicole.letourneau@ucalgary.ca). Collaboration or data access inquiries will be considered by the  
21 APrON study team.  
22  
23  
24  
25  
26  
27  
28  
29  
30  
31  
32

#### 33 Profile in a nutshell

- 34 • The APrON study is a longitudinal cohort of mothers, fathers and their children investigating maternal,  
35 parental, birth, and child development outcomes.
- 36 • A total of 2189 women (aged 16 to 44) and 1325 fathers (aged 18 to 52), residing around either Calgary or  
37 Edmonton, Alberta, enrolled and completed at least one questionnaire between May 2009 and June 2012.  
38 The majority were married, educated, had annual household incomes >\$70 000 and were born in Canada.
- 39 • Mothers completed 18 questionnaires and up to 4 clinic visits spanning pregnancy to three years postpartum  
40 and provided access to their medical records as well as three to four blood and two urine samples. To date,  
41 1648 mothers and 1255 fathers remain eligible for follow-up.
- 42 • The APrON dataset includes comprehensive socio-demographic and psychological data from pregnancy to  
43 three years postpartum, as well as maternal blood and urine samples. The 8-year data collection follow-up is  
44 ongoing and 12-year data follow-up will start in 2021.

45 Requests for data and collaboration are welcomed, contact Dr. Nicole Letourneau at  
46 [Nicole.letourneau@ucalgary.ca](mailto:Nicole.letourneau@ucalgary.ca)  
47  
48  
49

### 50 Data Availability Statement

1  
2  
3 Data can be collected at the Secondary Analysis to General Evidence (SAGE) data  
4 repository or by contacting Dr. Nicole Letourneau (the principal investigator for the APrON  
5 Study).  
6  
7  
8  
9

### 10 **Funding**

11  
12 This work was supported by the Canadian Institutes of Health Research Doctoral Award  
13 (CIHR, grant number 394652).  
14  
15

### 16 **Acknowledgements**

17  
18 The authors acknowledge the contributions of all the families who took part in the APrON  
19 study, and the investigators, managers, research assistants, graduate and undergraduate students,  
20  
21  
22  
23  
24  
25  
26  
27  
28  
29  
30  
31  
32  
33  
34  
35  
36  
37  
38  
39  
40  
41  
42  
43  
44  
45  
46  
47  
48  
49  
50  
51  
52  
53  
54  
55  
56  
57  
58  
59  
60

### 26 **Conflict of Interest**

27  
28  
29  
30  
31  
32  
33  
34  
35  
36  
37  
38  
39  
40  
41  
42  
43  
44  
45  
46  
47  
48  
49  
50  
51  
52  
53  
54  
55  
56  
57  
58  
59  
60

## 31 **AUTHOR CONTRIBUTORSHIP STATEMENT**

- 32  
33  
34  
35  
36  
37  
38  
39  
40  
41  
42  
43  
44  
45  
46  
47  
48  
49  
50  
51  
52  
53  
54  
55  
56  
57  
58  
59  
60  
1. Elena Ali designed the manuscript, drafted the whole manuscript, analyzed and interpreted statistical data; created data tables; worked with co-authors to facilitate feedback and group work on the manuscripts; incorporated co-authors comments into manuscripts; edited the draft of the whole manuscript for content, grammar, format and style to create a final version for submission to the journal; revised and approved final version of manuscript; and agreed to be accountable for all aspects of the work involved in this manuscript.
2. Nicole Letourneau conceived the APrON study and the idea for manuscript, facilitated involvement with co-authors in creation of manuscript; designed the manuscript; obtained data; revised the whole draft for grammar, content, and style; provided final approval of the final version; agreed to be accountable for all aspects of the work.

- 1  
2  
3 3. Fariba Aghajafari analyzed and interpreted data; participated in discussions about design of the  
4 manuscript; drafted and revised a Nutrient Intake and Status paragraph in the manuscript;  
5 provided approval of final version; agreed to be accountable for all aspects of the work.  
6  
7
- 8  
9 4. Rhonda Bell contributed to design of the manuscript by suggesting what data to include in the  
10 manuscript; obtained and analyzed data; drafted and revised Gestational Weight Gain paragraph  
11 in the manuscript; provided final approval; and agreed to be accountable for all aspects of the  
12 work.  
13  
14
- 15 5. Andrea Deane obtained and interpreted data; revised draft for statistical content accuracy  
16 description of the methods; assisted with creating data tables; provided final approval for the  
17 manuscript; and agreed to be accountable for all aspects of the work.  
18  
19
- 20 6. Deborah Dewey obtained and interpreted data; contributed to design of the draft by suggesting  
21 what to include; revised manuscript for brevity and intellectual content; approved final version;  
22 and agreed to be accountable for all aspects of the work.  
23  
24
- 25 7. Catherine Field obtained, analyzed and interpreted data; drafted the Nutrient Intake and Status  
26 paragraph in the manuscript, and provided comments for the whole draft; provided final approval  
27 of the manuscript; and agreed to be accountable for all aspects of the work.  
28  
29
- 30 8. Gerald Giesbrecht conceived the APrON study; obtained and analyzed data; revised the draft;  
31 provided final approval of the final version; agreed to be accountable for all aspects of the work.  
32  
33
- 34 9. Bonnie Kaplan conceived the idea for the APrON study; overseen the obtainment of data; revised  
35 the manuscript; provided final approval; and agreed to be accountable for all aspects of the work.  
36  
37
- 38 10. Brenda Mun Ying Leung conceived the idea for the APrON study; overseen the obtainment of  
39 data; revised the manuscript; provided final approval; and agreed to be accountable for all aspects  
40 of the work.  
41  
42
- 43 11. Henry Ntanda analyzed and interpreted data; revised the draft for statistical accuracy; approved  
44 final version; and agreed to be accountable for all aspects of the work.  
45  
46
- 47 12. APrON Team includes a large number of individuals who all had all met the ICMJE criteria for  
48  
49  
50  
51  
52  
53  
54  
55  
56  
57  
58  
59  
60



1  
2  
3 authorship.  
4

## 5 **FIGURE LEGENDS**

- 8 • Figure 1. Socio-demographic characteristics of women in APrON, Calgary, Alberta, and  
9 Canada
- 10
- 11
- 12
- 13 • Figure 2. Data collection procedures
- 14

## 15 **REFERENCES**

- 16
- 17
- 18
- 19 1. Leung, B.M., et al., *Perinatal nutrition in maternal mental health and child development:*  
20 *Birth of a pregnancy cohort.* Early Hum Dev, 2016. **93**: p. 1-7.
- 21
- 22
- 23 2. Kaplan, B.J., et al., *The Alberta Pregnancy Outcomes and Nutrition (APrON) cohort*  
24 *study: rationale and methods.* Matern Child Nutr, 2014. **10**(1): p. 44-60.
- 25
- 26
- 27
- 28 3. Tough, S.C., et al., *Cohort Profile: The All Our Babies pregnancy cohort (AOB).* Int J  
29 Epidemiol, 2017. **46**(5): p. 1389-1390k.
- 30
- 31
- 32 4. Manca, D.P., et al., *The most effective strategy for recruiting a pregnancy cohort: a tale*  
33 *of two cities.* BMC Pregnancy Childb, 2013. **13**: p. 75.
- 34
- 35
- 36
- 37 5. Leung, B.M., et al., *Comparison of sample characteristics in two pregnancy cohorts:*  
38 *community-based versus population-based recruitment methods.* BMC Med Res  
39 Methodol, 2013. **13**: p. 149.
- 40
- 41
- 42
- 43
- 44 6. Dzakpasu, S., et al., *The Canadian maternity experiences survey: design and methods.* J  
45 Obstet Gynaecol Can, 2008. **30**(3): p. 207-216.
- 46
- 47
- 48
- 49 7. Leung, B.M., et al., *Prenatal micronutrient supplementation and postpartum depressive*  
50 *symptoms in a pregnancy cohort.* BMC Pregnancy Childb, 2013. **13**: p. 2.
- 51
- 52
- 53
- 54
- 55
- 56
- 57
- 58
- 59
- 60

- 1  
2  
3 8. Letourneau, N., et al., *Maternal and paternal perinatal depressive symptoms associate*  
4 *with 2- and 3-year-old children's behaviour: findings from the APrON longitudinal study.*  
5  
6 BMC Pediatr, 2019. **19**(1): p. 435.  
7
- 8  
9  
10 9. Leung, B.M., et al., *Predictors of Postpartum Depression in Partnered Mothers and*  
11 *Fathers from a Longitudinal Cohort.* Community Ment Health J, 2017. **53**(4): p. 420-431.  
12  
13
- 14 10. Letourneau, N., et al., *Intergenerational transmission of adverse childhood experiences*  
15 *via maternal depression and anxiety and moderation by child sex.* J Dev Orig Health Dis,  
16  
17 2019. **10**(1): p. 88-99.  
18  
19
- 20 11. Bergink, V., et al., *Validation of the Edinburgh Depression Scale during pregnancy.* J  
21  
22 Psychosom Res, 2011. **70**: p. 385-389.  
23  
24
- 25 12. Paulson, J.F. and S.D. Bazemore, *Prenatal and Postpartum Depression in Fathers and Its*  
26 *Association With Maternal Depression.* JAMA, 2010. **303**(19): p. 1961-1969.  
27  
28
- 29 13. Felitti, V.J., et al., *Relationship of childhood abuse and household dysfunction to many of*  
30 *the leading causes of death in adults. The Adverse Childhood Experiences (ACE) Study.*  
31  
32 Am J Prev Med, 1998. **14**(4): p. 245-58.  
33  
34
- 35 14. Hughes, K., et al., *The effect of multiple adverse childhood experiences on health: a*  
36 *systematic review and meta-analysis.* Lancet Publ Heal, 2017. **2**(8): p. e356-e366.  
37  
38
- 39 15. Government of Canada. *Prenatal Nutrition Guidelines for Health Professionals:*  
40 *Gestational Weight Gain.* 2010 [cited 2020 21 Jan]; Available from:  
41  
42 [https://www.canada.ca/en/health-canada/services/canada-food-guide/resources/prenatal-](https://www.canada.ca/en/health-canada/services/canada-food-guide/resources/prenatal-nutrition/eating-well-being-active-towards-healthy-weight-gain-pregnancy-2010.html)  
43 [nutrition/eating-well-being-active-towards-healthy-weight-gain-pregnancy-2010.html](https://www.canada.ca/en/health-canada/services/canada-food-guide/resources/prenatal-nutrition/eating-well-being-active-towards-healthy-weight-gain-pregnancy-2010.html).  
44  
45  
46  
47  
48
- 49 16. Begum, F., et al., *Gestational weight gain and early postpartum weight retention in a*  
50 *prospective cohort of Alberta women.* J Obstet Gynaecol Can, 2012. **34**(7): p. 637-47.  
51  
52  
53  
54  
55  
56  
57  
58  
59  
60

17. Jarman, M., et al., *Patterns and trajectories of gestational weight gain: a prospective cohort study*. CMAJ Open, 2016. **4**(2): p. E338-45.
18. Subhan, F.B., et al., *Association of pre-pregnancy BMI and gestational weight gain with fat mass distribution and accretion during pregnancy and early postpartum: a prospective study of Albertan women*. BMJ Open, 2019. **9**(7): p. e026908.
19. Jarman, M., et al., *Dietary Patterns Prior to Pregnancy and Associations with Pregnancy Complications*. Nutrients, 2018. **10**(7).
20. APrON and ENRICH Study Teams, *Adherence to Canada's Food Guide Recommendations during Pregnancy: Nutritional Epidemiology and Public Health*. Curr Dev Nutr, 2017. **1**(7): p. e000356.
21. Aghajafari, F., et al., *Association between maternal serum 25-hydroxyvitamin D level and pregnancy and neonatal outcomes: systematic review and meta-analysis of observational studies*. Bmj, 2013. **346**: p. f1169.
22. Aghajafari, F., et al., *Plasma 3-Epi-25-Hydroxycholecalciferol Can Alter the Assessment of Vitamin D Status Using the Current Reference Ranges for Pregnant Women and Their Newborns*. J Nutr, 2016. **146**(1): p. 70-5.
23. Aghajafari, F., et al., *The Current Recommended Vitamin D Intake Guideline for Diet and Supplements During Pregnancy Is Not Adequate to Achieve Vitamin D Sufficiency for Most Pregnant Women*. PLoS One, 2016. **11**(7): p. e0157262.
24. Aghajafari, F., et al., *The High Prevalence of Vitamin D Insufficiency in Cord Blood in Calgary, Alberta (APrON-D Study)*. J Obstet Gynaecol Can, 2017. **39**(5): p. 347-353.e1.
25. Wallace, T.C., et al., *Choline: The Neurocognitive Essential Nutrient of Interest to Obstetricians and Gynecologists*. J Diet Suppl, 2019: p. 1-20.

- 1  
2  
3 26. Lewis, E.D., et al., *Estimation of choline intake from 24 h dietary intake recalls and*  
4 *contribution of egg and milk consumption to intake among pregnant and lactating women*  
5 *in Alberta*. Br J Nutr, 2014. **112**(1): p. 112-21.  
6  
7  
8  
9  
10 27. European Food Safety Authority, *Dietary reference values: EFSA publishes advice on*  
11 *choline*. 2016. p. 1-70.  
12  
13  
14 28. Daniels, J.L., et al., *Attitudes toward participation in a pregnancy and child cohort study.*  
15 *Paediatr Perinat Epidemiol*, 2006. **20**(3): p. 260-6.  
16  
17  
18  
19  
20  
21  
22  
23  
24  
25  
26  
27  
28  
29  
30  
31  
32  
33  
34  
35  
36  
37  
38  
39  
40  
41  
42  
43  
44  
45  
46  
47  
48  
49  
50  
51  
52  
53  
54  
55  
56  
57  
58  
59  
60

Figure 1. Socio-demographic characteristics of women in APrON, Calgary, Alberta, and Canada

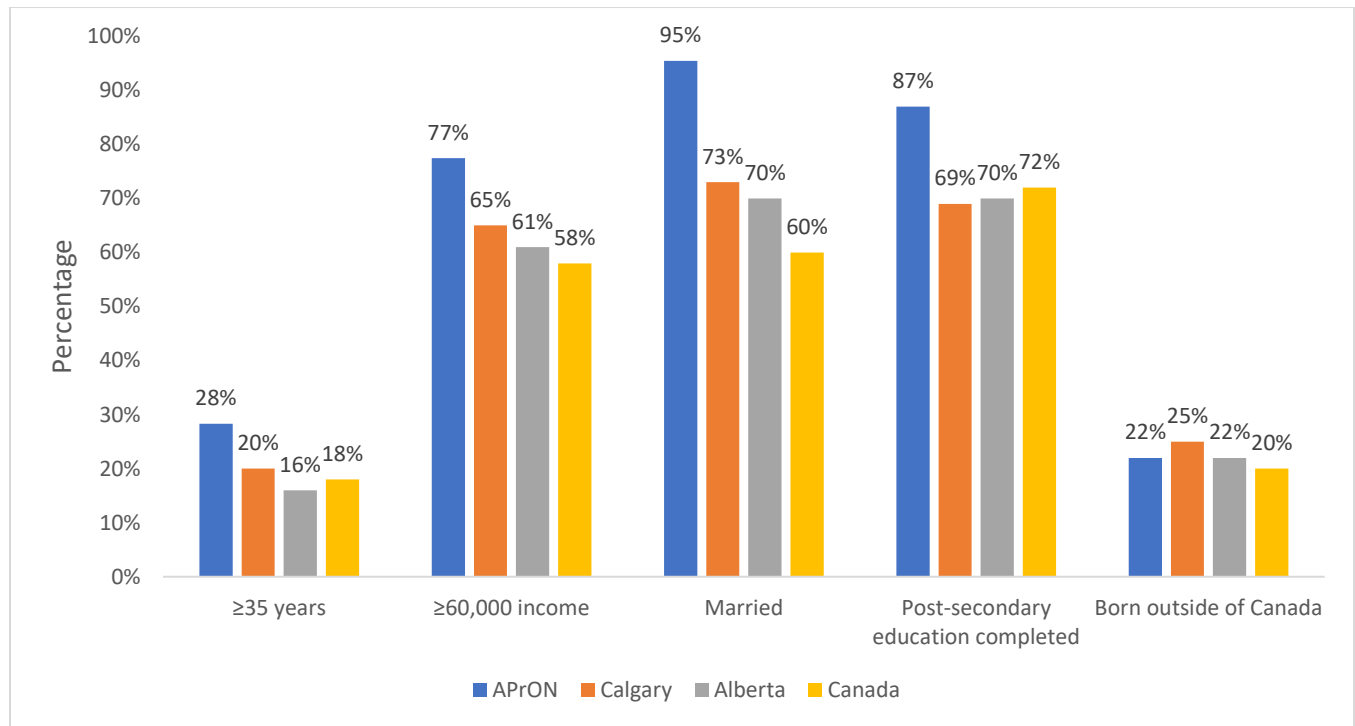

Figure 2. Data collection procedures

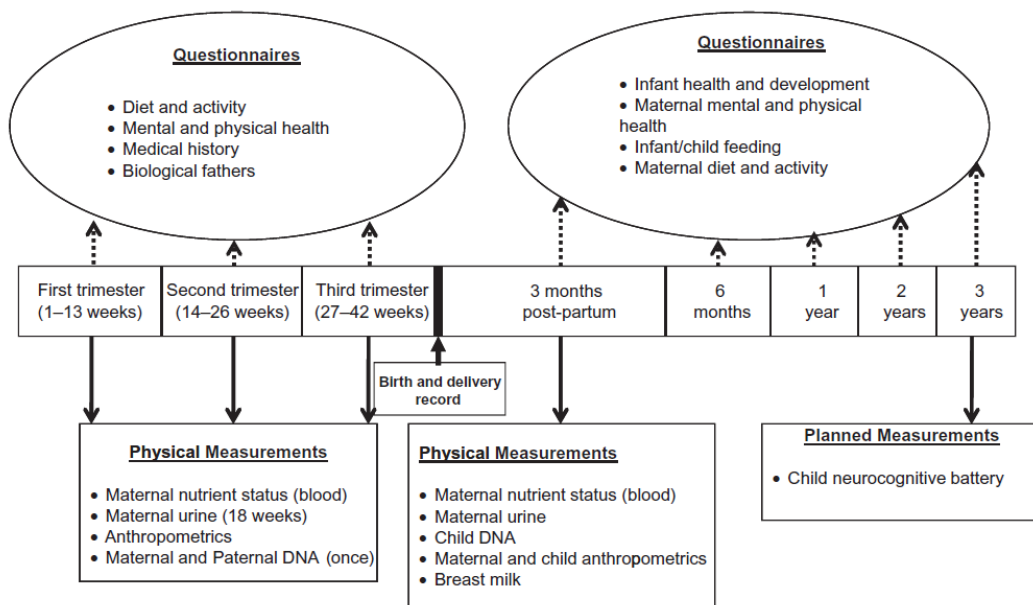

# BMJ Open

## The Alberta Pregnancy Outcomes and Nutrition Cohort (APrON) Study: Cohort Profile and Key Findings from the First Three Years

|                                 |                                                                                                                                                                                                                                                                                                                                                                                                                                                                                                                                                                                                                                                                                                                                                                                                                                                                                                                                                                                                                                                                                                                                                                                                                                                |
|---------------------------------|------------------------------------------------------------------------------------------------------------------------------------------------------------------------------------------------------------------------------------------------------------------------------------------------------------------------------------------------------------------------------------------------------------------------------------------------------------------------------------------------------------------------------------------------------------------------------------------------------------------------------------------------------------------------------------------------------------------------------------------------------------------------------------------------------------------------------------------------------------------------------------------------------------------------------------------------------------------------------------------------------------------------------------------------------------------------------------------------------------------------------------------------------------------------------------------------------------------------------------------------|
| Journal:                        | <i>BMJ Open</i>                                                                                                                                                                                                                                                                                                                                                                                                                                                                                                                                                                                                                                                                                                                                                                                                                                                                                                                                                                                                                                                                                                                                                                                                                                |
| Manuscript ID                   | bmjopen-2020-047503.R1                                                                                                                                                                                                                                                                                                                                                                                                                                                                                                                                                                                                                                                                                                                                                                                                                                                                                                                                                                                                                                                                                                                                                                                                                         |
| Article Type:                   | Cohort profile                                                                                                                                                                                                                                                                                                                                                                                                                                                                                                                                                                                                                                                                                                                                                                                                                                                                                                                                                                                                                                                                                                                                                                                                                                 |
| Date Submitted by the Author:   | 23-Aug-2021                                                                                                                                                                                                                                                                                                                                                                                                                                                                                                                                                                                                                                                                                                                                                                                                                                                                                                                                                                                                                                                                                                                                                                                                                                    |
| Complete List of Authors:       | Letourneau, Nicole; University of Calgary, Faculty of Nursing; University of Calgary Cumming School of Medicine, Pediatrics, Psychiatry and Community Health Sciences<br>Ali, Elena; University of Calgary, Faculty of Nursing<br>Aghajafari, Fariba; University of Calgary, Family Medicine; University of Calgary Cumming School of Medicine, Community Health Sciences<br>Bell, Rhonda; University of Alberta, Agricultural, Food and Nutritional Science<br>Deane, Andrea; University of Calgary Cumming School of Medicine, Pediatrics<br>Dewey, Deborah ; University of Calgary Cumming School of Medicine, Paediatrics; University of Calgary Cumming School of Medicine, Community Health Sciences<br>Field, Catherine; University of Alberta, Department of Agricultural, Food and Nutritional Science<br>Giesbrecht, Gerald ; University of Calgary, Pediatrics; University of Calgary, Community Health Sciences<br>Kaplan, Bonnie; University of Calgary Cumming School of Medicine, Pediatrics<br>Leung, Brenda; University of Calgary Cumming School of Medicine, Community Health Sciences; University of Lethbridge, Faculty of Health Sciences<br>Ntanda, Henry; University of Calgary Cumming School of Medicine, Pediatrics |
| <b>Primary Subject Heading</b>: | Mental health                                                                                                                                                                                                                                                                                                                                                                                                                                                                                                                                                                                                                                                                                                                                                                                                                                                                                                                                                                                                                                                                                                                                                                                                                                  |
| Secondary Subject Heading:      | Nutrition and metabolism, Paediatrics, Public health                                                                                                                                                                                                                                                                                                                                                                                                                                                                                                                                                                                                                                                                                                                                                                                                                                                                                                                                                                                                                                                                                                                                                                                           |
| Keywords:                       | NUTRITION & DIETETICS, MENTAL HEALTH, PAEDIATRICS, PUBLIC HEALTH                                                                                                                                                                                                                                                                                                                                                                                                                                                                                                                                                                                                                                                                                                                                                                                                                                                                                                                                                                                                                                                                                                                                                                               |
|                                 |                                                                                                                                                                                                                                                                                                                                                                                                                                                                                                                                                                                                                                                                                                                                                                                                                                                                                                                                                                                                                                                                                                                                                                                                                                                |

SCHOLARONE™  
Manuscripts

1  
2  
3  
4  
5  
6  
7  
8  
9  
10  
11  
12  
13  
14  
15  
16  
17  
18  
19  
20  
21  
22  
23  
24  
25  
26  
27  
28  
29  
30  
31  
32  
33  
34  
35  
36  
37  
38  
39  
40  
41  
42  
43  
44  
45  
46  
47  
48  
49  
50  
51  
52  
53  
54  
55  
56  
57  
58  
59  
60





I, the Submitting Author has the right to grant and does grant on behalf of all authors of the Work (as defined in the below author licence), an exclusive licence and/or a non-exclusive licence for contributions from authors who are: i) UK Crown employees; ii) where BMJ has agreed a CC-BY licence shall apply, and/or iii) in accordance with the terms applicable for US Federal Government officers or employees acting as part of their official duties; on a worldwide, perpetual, irrevocable, royalty-free basis to BMJ Publishing Group Ltd ("BMJ") its licensees and where the relevant Journal is co-owned by BMJ to the co-owners of the Journal, to publish the Work in this journal and any other BMJ products and to exploit all rights, as set out in our [licence](#).

The Submitting Author accepts and understands that any supply made under these terms is made by BMJ to the Submitting Author unless you are acting as an employee on behalf of your employer or a postgraduate student of an affiliated institution which is paying any applicable article publishing charge ("APC") for Open Access articles. Where the Submitting Author wishes to make the Work available on an Open Access basis (and intends to pay the relevant APC), the terms of reuse of such Open Access shall be governed by a Creative Commons licence – details of these licences and which [Creative Commons](#) licence will apply to this Work are set out in our licence referred to above.

Other than as permitted in any relevant BMJ Author's Self Archiving Policies, I confirm this Work has not been accepted for publication elsewhere, is not being considered for publication elsewhere and does not duplicate material already published. I confirm all authors consent to publication of this Work and authorise the granting of this licence.

The Alberta Pregnancy Outcomes and Nutrition Cohort (APrON) Study: Cohort Profile and Key  
Findings from the First Three Years

**Authors:** Nicole Letourneau<sup>1,2</sup>, Elena Ali<sup>1</sup>, Fariba Aghajafari<sup>3</sup>, Rhonda Bell<sup>4</sup>, Andrea J. Deane<sup>5</sup>,  
Deborah Dewey<sup>5</sup>, Catherine Field<sup>4</sup>, Gerald Giesbrecht<sup>6</sup>, Bonnie Kaplan<sup>6</sup>, Brenda Leung<sup>7</sup>, Henry  
Ntanda<sup>5</sup>, & APrON Study Team

**Author affiliations:** <sup>1</sup> Faculty of Nursing, University of Calgary, Calgary, AB, Canada;

<sup>2</sup> Cumming School of Medicine (Paediatrics, Psychiatry & Community Health Sciences),

University of Calgary, Calgary, AB, Canada; <sup>3</sup> Cumming School of Medicine (Family Medicine

& Community Health Sciences), University of Calgary, Calgary, AB, Canada; <sup>4</sup> Faculty of

Agricultural, Life & Environmental Sciences, University of Alberta, Edmonton, AB, Canada;

<sup>5</sup> Cumming School of Medicine (Paediatrics), University of Calgary, Calgary, AB, Canada; <sup>6</sup>

Cumming School of Medicine (Paediatrics & Community Health Sciences), University of

Calgary, Calgary, AB, Canada; <sup>7</sup> University of Lethbridge (Health Science – Public Health

Program), University of Lethbridge, Lethbridge, AB, Canada

**Corresponding author:**

Nicole Letourneau

Faculty of Nursing

Cumming School of Medicine (Paediatrics, Psychiatry & Community Health Sciences)

University of Calgary

2500 University Drive NW

Calgary, AB

T2N 1N4

Telephone: (403) 210-3833

E-mail: [nicole.letourneau@ucalgary.ca](mailto:nicole.letourneau@ucalgary.ca)

1  
2  
3 **Word count:** 4457 words  
4

5 **Keywords:** Nutrition & dietetics, mental health, paediatrics, public health  
6

7 **Acknowledgements**  
8

9  
10 The authors acknowledge the contributions of all the families who took part in the APrON study,  
11  
12 and the investigators, managers, research assistants, graduate and undergraduate students,  
13  
14 volunteers and clerical staff of the APrON study team.  
15  
16  
17  
18  
19  
20  
21  
22  
23  
24  
25  
26  
27  
28  
29  
30  
31  
32  
33  
34  
35  
36  
37  
38  
39  
40  
41  
42  
43  
44  
45  
46  
47  
48  
49  
50  
51  
52  
53  
54  
55  
56  
57  
58  
59  
60

## Abstract

**Objectives.** The objectives of the ongoing Canadian longitudinal cohort called the Alberta Pregnancy Outcomes and Nutrition (APrON) Study were to: (1) determine the relationship between maternal nutrient intake and status before, during, after pregnancy, and (a) maternal mental health, (b) pregnancy and birth outcomes, and (c) infant/child neurodevelopment and behavior; (2) identify maternal mental health and nutrient predictors of child behaviour; and (3) establish a DNA biobank to explore genomic predictors of children's neurodevelopment and behavior. Drawn mostly from data collected during the period from pregnancy to when children are 3 years of age, the objectives of this paper are to describe the participants, measures, and key findings on maternal and paternal mental health, maternal nutrition, and child outcomes.

However data have been collected to 8 years of age, with planned follow-up at 12 years of age.

**Data Collection.** Data comprise: questionnaires completed by pregnant women/mothers and their partners (usually fathers) on mothers', fathers' and children's health; dietary interviews; clinical assessments; linkage to hospital obstetrical records; and biological samples such as DNA.

**Key Findings.** Mental health, nutrition and child outcomes are presented. For example, APrON women who consumed more selenium and omega-3 were less likely to develop symptoms of perinatal depression. Couples in which both mothers and fathers were affected by perinatal depression reported lower incomes and higher maternal prenatal depressive symptoms and lower support from fathers postnatally and their children presented with the most behavioural problems. Higher prenatal consumption of choline rich foods such as eggs and milk were recommended as was vitamin D supplementation for both mothers and children to meet guidelines. Maternal experiences of early adversity predicted increased likelihood of perinatal depression and anxiety and children's behavioural problems.

1  
2  
3 **Conclusion.** The APrON cohort offers a unique opportunity to advance understanding of the  
4 developmental origins of health and disease.  
5  
6  
7  
8  
9  
10

### 11 **Strengths and Limitations**

- 12  
13  
14 1. APrON is a large, ongoing longitudinal study designed to understand the early origins of  
15 health and disease;  
16  
17 2. APrON has collected data to eight years of age and has planned follow up at 12 years of age;  
18  
19 3. APrON has retained more than 88% of participants at the 8-year data collection; and  
20  
21 4. A limitation is that the cohort is largely low-risk, limiting generalizability of study findings to  
22  
23  
24  
25  
26  
27  
28  
29  
30  
31  
32  
33  
34  
35  
36  
37  
38  
39  
40  
41  
42  
43  
44  
45  
46  
47  
48  
49  
50  
51  
52  
53  
54  
55  
56  
57  
58  
59  
60
- For peer review only - <http://bmjopen.bmj.com/site/about/guidelines.xhtml>

1  
2  
3 The Alberta Pregnancy Outcomes and Nutrition Cohort (APrON) Study: Cohort Profile and Key  
4  
5 Findings from the First Three Years  
6

7  
8 **Why was the APrON cohort set up?**  
9

10 The Alberta Pregnancy Outcomes and Nutrition (APrON) study is a longitudinal cohort of  
11 pregnant women, their partners<sup>1</sup>, and children in Alberta, Canada. The APrON study was  
12 designed to investigate the effect of nutrient intake and status during pregnancy on maternal  
13 mental health and children's neurodevelopment and behaviour [1, 2]. An original grant of \$5  
14 million provided the foundation for the APrON study, which has subsequently expanded its focus  
15 and contributed to over 50 additional projects on the psychobiology of stress, parent-child  
16 relationships and attachment, neurotoxicant exposure, genetics, epigenetics, inflammation and  
17 immune activity, probiotics, the microbiome and children's brain development. To date, the  
18 APrON study has received over \$15 million in additional funding. This funding enables follow-  
19 up of APrON families to when children reach 12 years of age to understand the impact of  
20 medical, biological, and environmental factors on children's development, behavior and mental  
21 health. Data collection for the five and eight-year follow-up questionnaires is complete, with  
22 these data currently being cleaned for analysis and the 12-year follow-up will begin in 2022.  
23 Papers have been published detailing how women and their partners were recruited [3, 4] and  
24 describing the APrON cohort at enrollment during pregnancy [5, 6] and up to 12 months  
25 postpartum [7]; however a summary of key findings has not been reported. Thus, drawn mostly  
26 from data collected during the period from pregnancy to when children are 3 years of age, the  
27 objectives of this paper are to describe the: (2) participants, (2) measures, and (3) key findings on  
28 maternal and paternal mental health, maternal nutrition, and child outcomes.  
29  
30  
31  
32  
33  
34  
35  
36  
37  
38  
39  
40  
41  
42  
43  
44  
45  
46  
47  
48  
49  
50  
51  
52  
53

---

54  
55 <sup>1</sup> Women in our study are biological mothers. Partners typically self-identified as fathers of their children, whether  
56 biological or not.  
57  
58  
59  
60

### Who is in the APrON cohort?

Women were recruited into the cohort if they were 16 years of age or older, able to speak and read English, < 27 weeks gestation and willing to come for on-site clinic visits at the University of Calgary, Calgary or University of Alberta, Edmonton, Alberta. Partners were eligible if they were cohabitating with the participating woman. Participants were excluded if they planned to move out of the region during the clinic visit timeframe of pregnancy to 3 months postpartum. A total of 2189 pregnant women (aged 16 to 44) and 1325 men (aged 18 to 52), residing around Calgary or Edmonton, were enrolled in the study between May 2009 and June 2012. The APrON study was approved by the University of Calgary Health Research Ethics Board (REB14-1702) and University of Alberta Health Research Ethics Biomedical Panel (Pro00002954). To assess the representativeness of the APrON cohort (see Table 1), sociodemographic characteristics of participants at the time of recruitment were compared to characteristics of women with children in Calgary, Alberta, and Canada [6, 8, 9].

### Patient and Public Involvement

APrON cohort participants were not involved in the development of the initial study design or in the recruitment of participants. However, APrON established a participant advisory committee (PAC) shortly after recruitment ended in 2012. Over time, 70 parents have participated on the PAC, with approximately 10 to 15 parents taking part in twice yearly meetings to advise the Principal and Co-Investigators on a variety of topics, for example, how to keep participants engaged and interested in APrON research, priorities for future APrON research, and feedback on laymen research summaries posted to APrON's website. APrON has also extensively disseminated knowledge to the public via various modalities including: multiple presentations to various stakeholders, APrON's Newsletter, website (<https://apronstudy.ca/>) and conferences. Held via Zoom due to COVID-19 on October 29-30<sup>th</sup>, 2020, APrON hosted an online conference

1  
2  
3 titled *Celebrating 10 Years: Alberta Pregnancy Outcomes and Nutrition (APrON) Achievements*  
4 & *Evolution Conference*, that attracted over 300 attendees, many who were APrON participants.  
5  
6

7 The APrON cohort PAC members held their own panel session where they spoke to the attendees  
8  
9 about their experiences with APrON, why they think the research is so important and how we can  
10  
11 continue for years to come.  
12  
13  
14  
15  
16  
17  
18  
19  
20  
21  
22  
23  
24  
25  
26  
27  
28  
29  
30  
31  
32  
33  
34  
35  
36  
37  
38  
39  
40  
41  
42  
43  
44  
45  
46  
47  
48  
49  
50  
51  
52  
53  
54  
55  
56  
57  
58  
59  
60



1  
2  
3  
4 Table 1. *Participant Intake Characteristics (N = 3514)*  
5  
6  
7  
8  
9  
10  
11  
12  
13  
14  
15  
16  
17  
18  
19  
20  
21  
22  
23  
24  
25  
26  
27  
28  
29  
30  
31  
32  
33  
34  
35  
36  
37  
38  
39  
40  
41  
42  
43  
44  
45  
46  
47  
48  
49  
50  
51  
52  
53  
54  
55  
56  
57  
58  
59  
60

For peer review only

1  
2  
3  
4  
5  
6  
7  
8  
9  
10  
11  
12  
13  
14  
15  
16  
17  
18  
19  
20  
21  
22  
23  
24  
25  
26  
27  
28  
29  
30  
31  
32  
33  
34  
35  
36  
37  
38  
39  
40  
41  
42  
43  
44  
45  
46  
47  
48  
49  
50  
51  
52  
53  
54  
55  
56  
57  
58  
59  
60

| Category                                         | Maternal (n / %) | Paternal (n / %) |
|--------------------------------------------------|------------------|------------------|
| <b>Demographics</b>                              |                  |                  |
| <b>Age (years)</b>                               |                  |                  |
| 16 – 24                                          | 100 (4.6)        | 19 (1.4)         |
| 25 – 29                                          | 481 (22.0)       | 216 (15.4)       |
| 30 -34                                           | 980 (44.78)      | 493 (35.2)       |
| 35 -39                                           | 512 (23.4)       | 329 (23.5)       |
| ≥ 40                                             | 105 (4.8)        | 162 (11.6)       |
| Missing age information                          | 11 (0.5)         | 181 (12.9)       |
| <b>Marital status</b>                            |                  |                  |
| Married/common-law                               | 2035 (93.0)      | 1275 (91.1)      |
| Single/divorced/separated                        | 97 (4.4)         | 27 (1.9)         |
| Missing marital information                      | 57 (2.6)         | 98 (7.0)         |
| <b>Education</b>                                 |                  |                  |
| Less than a high school diploma                  | 59 (2.7)         | 31 (2.2)         |
| Completed high school diploma                    | 202 (9.2)        | 147 (10.5)       |
| Completed trade, technical                       | 404 (18.5)       | 376 (26.9)       |
| Completed university or more                     | 1442 (66.8)      | 746 (53.3)       |
| Missing education information                    | 83 (3.7)         | 100 (7.1)        |
| <b>Ethnicity</b>                                 |                  |                  |
| White                                            | 1693 (77.3)      | 1082 (77.3)      |
| Non-white                                        | 485 (22.2)       | 206 (14.7)       |
| Missing ethnic information                       | 11 (0.5)         | 112 (8.0)        |
| <b>Mothers' Report on total household income</b> |                  |                  |
| < \$40,000                                       | 190 (8.7)        | -                |
| \$40,000 - \$69,999                              | 279 (12.7)       | -                |
| \$70,000 - \$99,999                              | 464(21.2)        | -                |
| >\$100,000                                       | 1146 (52.3)      | -                |
| Missing household income information             | 110 (5.0)        | -                |
| <b>Born in Canada</b>                            |                  |                  |
| Yes                                              | 1618 (73.9)      | 1024 (73.1)      |
| No                                               | 481 (22.0)       | 277 (19.8)       |
| Missing country of birth                         | 90 (4.1)         | 99 (7.1)         |
| <b>Gravidity</b>                                 |                  |                  |
| Multigravida                                     | 1107 (51.6)      | n/a              |
| Primigravida                                     | 996 (46.4)       | n/a              |
| Missing gravidity information                    | 42 (2.0)         | n/a              |
| <b>Parity</b>                                    |                  |                  |
| 0                                                | 1222 (55.8)      | n/a              |
| 1                                                | 732 (33.4)       | n/a              |
| 2                                                | 181 (8.3)        | n/a              |
| ≥3                                               | 37 (1.7)         | n/a              |
| Missing parity information                       | 17 (0.8)         | n/a              |

1  
2  
3 A greater proportion of women in the cohort (28.0%) were over 34 years old compared  
4 with women in Calgary (20.0%), Alberta (16.0%), and Canada (18.0%). More APrON women  
5 were married (95%) compared with women in Calgary (73.0%), Alberta (70.0%), and Canada  
6 (60.0%). A greater proportion of women had household income of \$70,000 or more (77.0%)  
7 compared to Calgary (65.0%), Alberta (61.0%), and Canada (58.0%). More APrON women  
8 completed post-secondary education (87.0%) compared to women in Calgary (69.0%), Alberta  
9 (70.0%), and Canada (72.0%). The proportion of APrON women who were born outside of  
10 Canada (23.0%) was similar to the proportions in Calgary (25.0%), Alberta (22%), and Canada  
11 (20.0%) (see Figure 1).  
12  
13  
14  
15  
16  
17  
18  
19  
20  
21  
22  
23

### 24 **How often have APrON families been followed up?**

25  
26  
27 Between 2009 and 2012 the initial cohort completed questionnaires and clinical  
28 assessments three times during pregnancy, and at 3 months postpartum. Follow-up questionnaires  
29 were provided when their child was 6 months, and 1, 2 3, 5 and 8 years of age (see Figure 2). We  
30 plan a 12 year follow-up beginning in 2022.  
31  
32  
33  
34  
35

36 In total, 2189 women and 1325 men completed at least one questionnaire. Of the women,  
37 and their children (88.9%) are continuing participants, defined as those who did not become  
38 ineligible or were lost to follow-up. Participants who discontinued the study included women  
39 who miscarried, had a stillbirth, lost custody of their child, or for whom a maternal/child death  
40 was reported ( $n = 52$ , 2.4%); moved out of Calgary or Edmonton before three months postpartum  
41 ( $n = 43$ , 2.0%); or withdrew from the study citing loss of interest ( $n = 149$ ; 6.8%). The  
42 demographic characteristics of participants who continued in APrON compared with those that  
43 discontinued are provided in Table 2.  
44  
45  
46  
47  
48  
49  
50  
51  
52  
53  
54  
55  
56  
57  
58  
59  
60

Table 2. Comparison of Demographic Characteristics of Continuing and Discontinued Participants

| Characteristic                     | Continuing participants<br>n (%) | Discontinuing participants |                            |                      | P-value* |
|------------------------------------|----------------------------------|----------------------------|----------------------------|----------------------|----------|
|                                    |                                  | Become ineligible<br>n (%) | Lost to follow-up<br>n (%) | Dropped out<br>n (%) |          |
| <b>Maternal age</b>                |                                  |                            |                            |                      |          |
| 16 – 24                            | 71 (3.6)                         | 8 (18.6)                   | 15 (34.8)                  | 6 (4.1)              | < 0.001  |
| 25 – 29                            | 424 (16.2)                       | 7 (16.2)                   | 7 (16.2)                   | 43 (29.2)            |          |
| 30 – 34                            | 899 (46.2)                       | 15 (34.8)                  | 14 (32.5)                  | 51 (34.7)            |          |
| 35 – 39                            | 454 (23.3)                       | 9 (20.9)                   | 7 (16.2)                   | 41 (27.9)            |          |
| ≥40                                | 95 (4.8)                         | 4 (9.3)                    | 0 (0.0)                    | 6 (4.1)              |          |
| <b>Marital status</b>              |                                  |                            |                            |                      |          |
| Single                             | 72 (3.8)                         | 12 (24.5)                  | 8 (21.1)                   | 5 (3.8)              | 0.007    |
| Married                            | 1838 (96.2)                      | 37 (75.5)                  | 30 (78.9)                  | 128 (96.2)           |          |
| <b>Maternal education</b>          |                                  |                            |                            |                      |          |
| Less than a high school diploma    | 41 (2.2)                         | 6 (16.2)                   | 8 (20.5)                   | 4 (3.01)             | <0.001   |
| Completed high school diploma      | 164 (8.6)                        | 9 (24.3)                   | 9 (23.1)                   | 20 (15.0)            |          |
| Completed trade, technical diploma | 362 (19.1)                       | 5 (13.5)                   | 10 (25.6)                  | 26 (19.5)            |          |
| Completed university or more       | 1329 (70.1)                      | 17 (45.9)                  | 12 (30.6)                  | 83 (62.4)            |          |
| <b>Household income</b>            |                                  |                            |                            |                      |          |
| < \$40,000                         | 151 (8.1)                        | 12 (30.8)                  | 19 (54.3)                  | 8 (6.15)             | <0.001   |
| \$40,000-\$60,000                  | 252 (13.4)                       | 6 (15.4)                   | 5 (14.3)                   | 16 (12.31)           |          |
| \$70,000-\$99,999                  | 428 (22.8)                       | 7 (17.9)                   | 4 (11.4)                   | 24 (18.46)           |          |
| ≥ \$100,000                        | 1042 (55.6)                      | 14 (35.9)                  | 7 (20.0)                   | 82 (63.08)           |          |
| <b>Born in Canada</b>              |                                  |                            |                            |                      |          |
| No                                 | 425 (22.5)                       | 13 (32.5)                  | 14 (37.8)                  | 28 (21.2)            | 0.186    |
| Yes                                | 1463 (77.5)                      | 27 (67.5)                  | 23 (62.2)                  | 104 (78.8)           |          |

Note. Assessing the null hypothesis that there is no difference in distributions between those participants who continued and those who did not continue in the study; chi-square test

Continuing participants were more likely to be older, married, and to have higher education and household incomes (all  $ps < 0.05$ ). The proportion of continuing participants born in Canada was similar to discontinuing participants. When mothers were lost to follow-up, so too were fathers and children.

### What has the APrON study measured?

1  
2  
3 Women were asked to complete questionnaires three times during pregnancy (<14, 14-26,  
4 and 27-40 weeks gestation, number of scales administered was 37) and seven times postnatally (3  
5 and 6 months, 1, 2, 3, 5, and 8 years, number of scales administered was 77). Partners (usually  
6 self-reported fathers) were asked to complete questionnaires when their partners were 14-26  
7 weeks gestational age (number of scales administered was 16), and twice postnatally (3 months  
8 and 5 years, number of scales administered was 14). Questionnaires administered during  
9 pregnancy measured previous and current mental and physical health status, nutritional,  
10 medication and supplement intake, lifestyle choices, healthcare services used, social support,  
11 attitudes towards breastfeeding, and sociodemographic variables. The follow-up postpartum  
12 questionnaires collected information about labor and delivery, postpartum medical problems,  
13 maternal and paternal mental health and stress, nutritional, medication and supplement intake,  
14 lifestyle choices, food security, parenting, experiences in close relationships, and  
15 sociodemographics (see Figure 2). Measures were selected based on several synergistic priorities.  
16 First, the APrON team had to judge measures to be reliable and valid indicators of the constructs  
17 of interest. Second, measures had to minimize burden to participants in terms of time and  
18 difficulty of completion, for example measures with fewer items and more accessible language  
19 were valued most. Finally, an APrON team member had to express an interest in using the  
20 measure. Full details and documentation of all APrON measures is available on request.

21  
22  
23  
24  
25  
26  
27  
28  
29  
30  
31  
32  
33  
34  
35  
36  
37  
38  
39  
40  
41  
42  
43  
44  
45 Clinic visits were undertaken to gather maternal anthropometric measurements during  
46 pregnancy and three months postpartum. These measures included height, pre-pregnancy and  
47 current weight, highest weight during pregnancy, circumference measurements (i.e., mid-upper  
48 arm, waist, hip, thigh), and skinfold thickness (i.e., biceps, triceps, subscapular, suprailiac, thigh).  
49 Each measurement was taken three times and averages were reported for analyses. Paternal  
50 height and weight were collected during the prenatal period. One objective of APrON was to  
51  
52  
53  
54  
55  
56  
57  
58  
59  
60

1  
2  
3 establish a biobank for future research that would allow investigation on genetics, epigenetics [1],  
4  
5 nutrient exposures and neurotoxicants. Thus, biosamples were also collected from mothers, their  
6  
7 partners and from infants during clinic visits. Midstream random urine samples (10 mL) were  
8  
9 collected from expectant mothers at 14-26 weeks gestation and three months postpartum. A  
10  
11 breast milk sample was collected from breastfeeding mothers to determine fatty acid  
12  
13 composition. Maternal non-fasting venous blood samples were collected from mothers at <14,  
14  
15 14-26, and 27-40 weeks gestation, and at three months postpartum. Maternal blood collection  
16  
17 provided whole blood, plasma, and serum, which were used for DNA, RNA, cytokines,  
18  
19 hematocrit, hemoglobin measures, thyroid hormones and measures of heavy metals (e.g.,  
20  
21 mercury, lead) and perfluorinated chemical exposure. Buccal cell samples were also collected at  
22  
23 14-26 weeks gestation from partners for DNA extraction and future genetic and epigenetic  
24  
25 studies. From infants, buccal and/or blood samples were collected at 3 months of age for DNA  
26  
27 extraction. Purified DNA is available at the Gene Expression Omnibus data repository  
28  
29 (<https://www.ncbi.nlm.nih.gov/geo/>). A detailed list of data collected up to 8 years of age on the  
30  
31 full sample is provided in Table 3.1 for mothers, Table 3.2 for fathers and Table 3.3 for children.  
32  
33  
34  
35  
36  
37  
38  
39  
40  
41  
42  
43  
44  
45  
46  
47  
48  
49  
50  
51  
52  
53  
54  
55  
56  
57  
58  
59  
60

Table 3.1. *Maternal Variables and Biological Samples Collected via Questionnaires and Clinic Visits*

| Variables                                  | <14 weeks | 14-26 weeks | 27-40 weeks | 3 months postpartum | 6 months postpartum | 1 year | 2 years | 3 years | 5 years | 8 years |
|--------------------------------------------|-----------|-------------|-------------|---------------------|---------------------|--------|---------|---------|---------|---------|
| <b>Socio-demographics</b>                  |           |             |             |                     |                     |        |         |         |         |         |
| Household income                           | X         |             |             |                     |                     |        |         |         | X       | X       |
| Education                                  | X         |             |             |                     |                     |        |         |         |         |         |
| Marital status                             | X         |             |             |                     |                     |        |         |         | X       | X       |
| Age                                        | X         |             |             |                     |                     |        |         |         |         |         |
| Primary language                           | X         |             |             |                     |                     |        |         |         |         |         |
| Born in Canada                             | X         |             |             |                     |                     |        |         |         |         |         |
| Family background                          |           | X           | X           | X                   | X                   | X      | X       | X       | X       | X       |
| Family history                             |           | X           |             |                     |                     |        |         |         |         |         |
| <b>Health and lifestyle</b>                |           |             |             |                     |                     |        |         |         |         |         |
| General health                             |           |             |             | SF-8                | SF-8                | SF-8   | SF-8    | SF-8    |         |         |
| Current medical conditions and medications | X         | X           | X           | X                   | X                   | X      | X       | X       |         |         |
| Substance use                              | X         | X           | X           | X                   | X                   | X      | X       | X       | X       |         |
| Parenting                                  |           |             |             |                     |                     |        |         |         | X       | X       |
| Pregnancy history                          |           |             |             |                     |                     |        |         |         |         |         |
| Pre-pregnancy physical activity            | X         | X           | X           | X                   | X                   | X      | X       | X       |         |         |
| Physical activity                          | GLTE      | GLTE        | GLTE        | GLTE                | GLTE                | GLTE   | GLTE    | GLTE    | GLTE    |         |
| Dental care                                | X         | X           | X           |                     |                     |        |         |         |         |         |
| Dietary changes since pregnancy            | X         |             |             |                     |                     |        |         |         |         |         |
| Food security                              |           |             | CCHSC       |                     | CCHSC               |        |         |         |         |         |
| Nutrition counselling information          |           |             |             | X                   |                     |        |         |         |         |         |
| Diet history pre-pregnancy                 |           | FFQ         |             |                     |                     |        |         |         |         |         |
| Nausea and vomiting                        | PUQUE     | PUQUE       | PUQUE       |                     |                     |        |         |         |         |         |
| Breastfeeding information                  |           |             |             | X                   | X                   | X      | X       | X       |         |         |
| 24-hour recall of foods consumed           | X         | X           | X           | X                   | X                   | X      | X       | X       |         |         |

1  
2  
3  
4  
5  
6  
7  
8  
9  
10  
11  
12  
13  
14  
15  
16  
17  
18  
19  
20  
21  
22  
23  
24  
25  
26  
27  
28  
29  
30  
31  
32  
33  
34  
35  
36  
37  
38  
39  
40  
41  
42  
43  
44  
45  
46  
47

|                                     |             |          |             |             |          |             |               |                    |                      |               |
|-------------------------------------|-------------|----------|-------------|-------------|----------|-------------|---------------|--------------------|----------------------|---------------|
| <b>Psychosocial health</b>          |             |          |             |             |          |             |               |                    |                      |               |
| Depression                          |             |          |             |             |          |             |               |                    |                      |               |
| Stress                              | EDS<br>SLEQ | EDS      | EDS<br>SLEQ | EDS<br>SLEQ | EDS      | EDS<br>SLEQ | EDS<br>SLEQ   | EDS<br>SLEQ<br>PSS | CESD<br>SLEQ,<br>PSS | CESD<br>SLEQ, |
| Social support                      |             |          |             |             |          |             |               |                    |                      |               |
| Attachment                          | SSQ         | SSQ      | SSQ         | SSQ         | SSQ      | SSQ         | SSQ           | SSQ                | SSQ,<br>SSI,<br>ECR  | SSI,<br>ECR   |
| DSM-IV Axis I disorders             |             | PDSQ     |             | PDSQ        |          |             |               |                    |                      |               |
| Anxiety                             | SCL-90-R    | SCL-90-R | SCL-90-R    | SCL-90-R    | SCL-90-R | SCL-90-R    | SCL-90-R<br>X | SCL-90-R           | SCL-90-R             | STAI          |
| Adverse childhood events            |             |          |             |             |          |             |               |                    |                      |               |
| History of mental health            | X           | X        | X           | X           |          | X           | X             | X                  |                      |               |
| Anthropometrics (BMI/height/weight) | X           | X        | X           |             |          |             |               |                    |                      |               |
| <b>Personality traits</b>           |             |          |             |             |          |             |               |                    |                      |               |
| Personality traits                  |             |          |             |             |          |             |               |                    |                      | TIPI          |
| <b>Biological specimens</b>         |             |          |             |             |          |             |               |                    |                      |               |
| Urine                               | X           | X        | X           | X           |          |             |               |                    |                      |               |
| Venous blood                        |             | X        |             | X           |          |             |               |                    |                      |               |
| Breast milk                         |             |          |             | X           |          |             |               |                    |                      |               |

Note. X refers to investigator-developed measures. SCL-90-R, Symptom Checklist-90-Revised; EDS, Edinburgh Depression Scale; PUQE, Pregnancy-Unique Quantification of Emesis and Nausea questionnaire; SLEQ, Stressful Life Events Questionnaire ; SSQ, Social Support Questionnaire; PDSQ, Psychiatric Diagnostic Screening Questionnaire; ACEs, Adverse Childhood Experiences Questionnaire; SF-8, Short Form Health Survey-8; CCHSC, Canadian Community Health Survey Cycle 2.2, modified; GLTE, Godin Leisure-Time Exercise Questionnaire; FFQ, Food Frequency Questionnaire, adapted from the Canadian version of the Diet History Questionnaire; SSI, Social Support Index; ECR, Experiences in Close Relationship Scale; PSS, Perceived Stress, CES-D, Centre for Epidemiologic Studies Depression Scale; OECD, Organization for Economic Cooperation and Development Guidelines on Measuring Subjective Wellbeing; STAI, State-Trait Anxiety Inventory; TIPI, Ten-Item Personality Inventory. \*Breastfeeding mothers only.



Table 3.2. *Paternal Variables and Biological Specimens Collected via Questionnaires and Clinic Visits*

| Variables                                             | <14 weeks gestation | 14-26 weeks | 27-40 weeks | 3 months postpartum | 5 years postpartum |
|-------------------------------------------------------|---------------------|-------------|-------------|---------------------|--------------------|
| <b>Socio-demographics</b>                             |                     |             |             |                     |                    |
| Household income                                      |                     |             | X           |                     |                    |
| Education                                             |                     |             | X           |                     |                    |
| Marital status                                        |                     |             | X           |                     |                    |
| Age                                                   |                     |             | X           |                     |                    |
| Primary language                                      |                     |             | X           |                     |                    |
| Born in Canada                                        |                     |             | X           |                     |                    |
| Family background                                     |                     |             | X           |                     | X                  |
| Family history*                                       |                     |             | X           |                     |                    |
| <b>Health and lifestyle</b>                           |                     |             |             |                     |                    |
| General health                                        |                     | X           | X           |                     |                    |
| Current medical conditions and medications            |                     | X           | X           | X                   |                    |
| Substance use                                         |                     | X           | X           | X                   | X                  |
| Physical Activity Anthropometrics (BMI/height/weight) |                     | GLTE<br>X   | GLTE<br>X   | GLTE<br>X           | GLTE               |
| <b>Psychosocial health</b>                            |                     |             |             |                     |                    |
| Depression                                            |                     | EDS         | EDS         | EDS                 | EDS                |
| Social support                                        |                     | SSQ         | SSQ         | SSQ                 | SSQ                |
| Stress                                                |                     |             | SLEQ        |                     | SLEQ               |
| Anxiety                                               |                     |             |             |                     | SCL-90-R           |
| <b>Biological specimens*</b>                          |                     |             |             |                     |                    |
| Buccal cell swab                                      |                     |             | X           |                     |                    |
| DNA from blood                                        |                     |             | X           |                     |                    |

Note. X refers to investigator-developed measures. EDS, Edinburgh Depression Scale; SLEQ, Stressful Life Events Questionnaire; SSQ, Social Support Questionnaire; GLTE, Godin Leisure-Time Exercise Questionnaire.

Table 3.3. *Child Variables and Biological Specimens Collected in Questionnaires and Clinic Visits*

| Variables                                                                | 3 months | 6 months | 1 year | 2 years | 3 years | 5 years | 8 years |
|--------------------------------------------------------------------------|----------|----------|--------|---------|---------|---------|---------|
| <b>Health and Development</b>                                            |          | X        | X      | X       | X       | X       | X       |
| <b>Occupation</b>                                                        | X        | X        | X      | X       | X       | X       |         |
| <b>Childcare</b>                                                         | X        | X        | X      | X       | X       | X       |         |
| <b>Vaccines</b>                                                          |          |          |        |         |         | X       |         |
| <b>Child food and liquid intake</b>                                      | X        | X        | X      | X       | X       | X       |         |
| <b>Children’s eating and drinking behaviours</b>                         |          |          |        |         |         | X       | X       |
| <b>Children’s activities</b>                                             |          |          |        |         |         | X       | X       |
| <b>Children’s injuries</b>                                               |          |          |        |         |         | X       |         |
| <b>Community</b>                                                         |          |          |        |         |         |         | X       |
| <b>Children’s education</b>                                              |          |          |        |         |         |         | X       |
| <b>General infant behaviours</b>                                         |          |          |        |         |         |         |         |
| Infant Behavior Questionnaire (IBQ)                                      | X        | X        | X      | X       |         |         |         |
| Scales of Independent Behaviors (SIB-R)                                  | X        | X        | X      | X       | X       | X       |         |
| Fussing and Crying                                                       | X        | X        | X      | X       |         |         |         |
| Sleeping                                                                 |          | X        | X      | X       | X       | X       | X       |
| Early Childhood Behavior Questionnaire (ECBQ)                            |          |          |        | X       |         |         |         |
| Children’s Behavior Questionnaire (CBQ)                                  |          |          |        |         | X       |         |         |
| Child Behaviour Checklist Ages 1.5 – 5 (CBCL)                            |          |          |        | X       | X       |         |         |
| Behaviour Rating Inventory of Executive Function-<br>Preschool (BRIEF-P) |          |          |        | X       | X       |         |         |
| Ages and Stages Questionnaire – Third Edition<br>(ASQ-3)                 |          |          |        |         |         | X       |         |
| Children’s Communication Checklist – Second<br>Edition (CCC-Q)           |          |          |        |         |         | X       |         |
| Behaviour Assessment System for Children –<br>Second Edition (BASC-2)    |          |          |        |         |         | X       | X       |
| <b>Media use</b>                                                         |          |          |        |         |         | X       | X       |
| <b>Quantitative Checklist for Autism in Toddlers</b>                     |          |          |        | X       | X       |         |         |
| <b>Temper Tantrum Scale – Past 2 Weeks</b>                               |          |          |        | X       | X       |         |         |
| <b>Temper Tantrum Scale – Past 6 Months</b>                              |          |          |        | X       | X       |         |         |
| <b>Parenting</b>                                                         |          |          |        |         |         | X       | X       |
| <b>Biological specimens</b>                                              |          |          |        |         |         |         |         |
| Buccal cells                                                             | X        |          |        |         |         |         |         |
| Venous blood                                                             | X        |          |        |         |         |         |         |

Numerous sub-studies, employing portions of the APrON sample have employed the originally collected biosamples in related research, for example the Neurotoxicant Study (n=546) that examined maternal exposure to endocrine hormone disrupting chemicals (i.e. bisphenol a and phthalates) on child outcomes [e.g., 10, 11-15] and the Parenting Research on Mental Illness, Stress and Epi/genetics (PROMISE; n=276) Study of gene by environment interactions [e.g., 16, 17-20]. Other sub-studies have collected additional biosamples for related research, for example maternal and infant cortisol and other measures such heart rate variability and parent-child interaction quality observations in the Fetal Programming Study [n=276; e.g., 21, 22-29].

### What has APrON found?

A complete list of publications from APrON can be found at <http://www.apronstudy.ca/research/publications-and-press>. Key findings from the full sample on maternal and paternal mental health, maternal nutrition and child outcomes have been summarized in Box 1 and below.

#### Box 1 Key findings

##### Mental health outcomes

##### Mental health outcomes

- In partnered couples, both mothers and fathers had depressive symptoms in 2.3% of couples. Low household income and prenatal maternal depression were associated with a higher probability of depressive symptoms in both partners. In 78.5% of couples, neither father nor mother experienced depressive symptoms. Postnatal social support was found to be a protective factor associated with decreased risk of maternal and paternal postpartum depressive symptoms. Risk factors for maternal postpartum depression symptoms included low household income, and prenatal EDS score  $\geq 10$ . For paternal postpartum depression symptoms, risk factors included low household income, prenatal EDS score of  $< 10$ , postpartum stressful life events, and smoking.
- Women with EDS scores  $< 10$  were more likely to take micronutrients (e.g., vitamins B6, B9, B12, and E; essential fatty acids; selenium); however only selenium and omega-3 were significantly different between depressed and non-depressed groups, with non-depressed mothers consuming higher amounts.
- 14% of mothers had a score of three or more adverse childhood experiences. Maternal exposure to early adversities predicted higher reported symptoms of perinatal depression and anxiety.

##### Nutrition outcomes

- Approximately 70% of women who entered pregnancy with a body mass index (BMI)  $> 25 \text{ kg/m}^2$  were likely to exceed gestational weight gain guidelines in the beginning of the second trimester. Women with excessive weight gain also gained higher amounts of body fat and retained higher amounts of fat compared to women who gained

1  
2  
3 within the guidelines. Women who consumed a healthy diet pattern prior to pregnancy were less likely to develop  
4 complications such as gestational hypertension.

- 5 • The median vitamin D intake from diet and supplements was 600 IU/day during pregnancy, which was not enough  
6 to achieve a target plasma circulation 25(OH)D concentration. A significant relationship between maternal  
7 reported dietary vitamin D intake and plasma 25(OH)D and 3-epi-25(OH)D3 concentration were identified.
- 8 • Only 23% of mothers met the adequate intake (AI) recommendations for choline; the number was even lower  
9 (10%) in the postpartum period. Consuming eggs and milk during pregnancy increased mothers' likelihood of  
10 meeting choline AI recommendations.

### 11 **Child Outcomes**

- 12 • Infants with higher birth weights and at 3 months of age had mothers with a higher pre-pregnancy BMI. Gestational  
13 weight gain above recommendations was associated with higher infant weight at birth and three months of age as  
14 well as more rapid postnatal growth.
- 15 • Infants' vitamin D status increases in direct proportion to mothers' vitamin D intake. Given many mothers are below  
16 recommended AI for vitamin D, both infants and breastfeeding mothers require vitamin D supplementation.
- 17 • Maternal experience of early adversity associates with maternal symptoms of anxiety and depression during the  
18 perinatal period as well as externalizing behavioral problems in their 2-year old children. Boys demonstrate greater  
19 vulnerability to the indirect effects of maternal adversity via both depression and anxiety.
- 20 • Both mothers' perinatal depressive symptoms and mothers' and fathers' co-occurring perinatal depressive symptoms  
21 predicted more problematic emotionally reactive, withdrawn, and total internalizing behaviors in their 2- to 3-year  
22 old children. Children's aggression, attention problems and total externalizing behaviors were only predicted by  
23 mothers' perinatal depressive symptoms.

### 24 **Mental health outcomes**

25  
26  
27  
28  
29  
30 Drawn from the full APrON cohort, three key papers [30-32] reported on perinatal  
31 depression and anxiety symptom prevalence and risk factors and the impact of adverse childhood  
32 experiences on maternal prenatal depression and anxiety. Many more papers report on parental  
33 mental health in sub-studies, see APrONstudy.ca for details.

### 34 **Predictors of Depression**

35  
36  
37  
38  
39  
40  
41  
42  
43  
44  
45  
46  
47  
48  
49  
50  
51  
52  
53  
54  
55  
56  
57  
58  
59  
60  
61  
62  
63  
64  
65  
66  
67  
68  
69  
70  
71  
72  
73  
74  
75  
76  
77  
78  
79  
80  
81  
82  
83  
84  
85  
86  
87  
88  
89  
90  
91  
92  
93  
94  
95  
96  
97  
98  
99  
100  
101  
102  
103  
104  
105  
106  
107  
108  
109  
110  
111  
112  
113  
114  
115  
116  
117  
118  
119  
120  
121  
122  
123  
124  
125  
126  
127  
128  
129  
130  
131  
132  
133  
134  
135  
136  
137  
138  
139  
140  
141  
142  
143  
144  
145  
146  
147  
148  
149  
150  
151  
152  
153  
154  
155  
156  
157  
158  
159  
160  
161  
162  
163  
164  
165  
166  
167  
168  
169  
170  
171  
172  
173  
174  
175  
176  
177  
178  
179  
180  
181  
182  
183  
184  
185  
186  
187  
188  
189  
190  
191  
192  
193  
194  
195  
196  
197  
198  
199  
200  
201  
202  
203  
204  
205  
206  
207  
208  
209  
210  
211  
212  
213  
214  
215  
216  
217  
218  
219  
220  
221  
222  
223  
224  
225  
226  
227  
228  
229  
230  
231  
232  
233  
234  
235  
236  
237  
238  
239  
240  
241  
242  
243  
244  
245  
246  
247  
248  
249  
250  
251  
252  
253  
254  
255  
256  
257  
258  
259  
260  
261  
262  
263  
264  
265  
266  
267  
268  
269  
270  
271  
272  
273  
274  
275  
276  
277  
278  
279  
280  
281  
282  
283  
284  
285  
286  
287  
288  
289  
290  
291  
292  
293  
294  
295  
296  
297  
298  
299  
300  
301  
302  
303  
304  
305  
306  
307  
308  
309  
310  
311  
312  
313  
314  
315  
316  
317  
318  
319  
320  
321  
322  
323  
324  
325  
326  
327  
328  
329  
330  
331  
332  
333  
334  
335  
336  
337  
338  
339  
340  
341  
342  
343  
344  
345  
346  
347  
348  
349  
350  
351  
352  
353  
354  
355  
356  
357  
358  
359  
360  
361  
362  
363  
364  
365  
366  
367  
368  
369  
370  
371  
372  
373  
374  
375  
376  
377  
378  
379  
380  
381  
382  
383  
384  
385  
386  
387  
388  
389  
390  
391  
392  
393  
394  
395  
396  
397  
398  
399  
400  
401  
402  
403  
404  
405  
406  
407  
408  
409  
410  
411  
412  
413  
414  
415  
416  
417  
418  
419  
420  
421  
422  
423  
424  
425  
426  
427  
428  
429  
430  
431  
432  
433  
434  
435  
436  
437  
438  
439  
440  
441  
442  
443  
444  
445  
446  
447  
448  
449  
450  
451  
452  
453  
454  
455  
456  
457  
458  
459  
460  
461  
462  
463  
464  
465  
466  
467  
468  
469  
470  
471  
472  
473  
474  
475  
476  
477  
478  
479  
480  
481  
482  
483  
484  
485  
486  
487  
488  
489  
490  
491  
492  
493  
494  
495  
496  
497  
498  
499  
500  
501  
502  
503  
504  
505  
506  
507  
508  
509  
510  
511  
512  
513  
514  
515  
516  
517  
518  
519  
520  
521  
522  
523  
524  
525  
526  
527  
528  
529  
530  
531  
532  
533  
534  
535  
536  
537  
538  
539  
540  
541  
542  
543  
544  
545  
546  
547  
548  
549  
550  
551  
552  
553  
554  
555  
556  
557  
558  
559  
560  
561  
562  
563  
564  
565  
566  
567  
568  
569  
570  
571  
572  
573  
574  
575  
576  
577  
578  
579  
580  
581  
582  
583  
584  
585  
586  
587  
588  
589  
590  
591  
592  
593  
594  
595  
596  
597  
598  
599  
600  
601  
602  
603  
604  
605  
606  
607  
608  
609  
610  
611  
612  
613  
614  
615  
616  
617  
618  
619  
620  
621  
622  
623  
624  
625  
626  
627  
628  
629  
630  
631  
632  
633  
634  
635  
636  
637  
638  
639  
640  
641  
642  
643  
644  
645  
646  
647  
648  
649  
650  
651  
652  
653  
654  
655  
656  
657  
658  
659  
660  
661  
662  
663  
664  
665  
666  
667  
668  
669  
670  
671  
672  
673  
674  
675  
676  
677  
678  
679  
680  
681  
682  
683  
684  
685  
686  
687  
688  
689  
690  
691  
692  
693  
694  
695  
696  
697  
698  
699  
700  
701  
702  
703  
704  
705  
706  
707  
708  
709  
710  
711  
712  
713  
714  
715  
716  
717  
718  
719  
720  
721  
722  
723  
724  
725  
726  
727  
728  
729  
730  
731  
732  
733  
734  
735  
736  
737  
738  
739  
740  
741  
742  
743  
744  
745  
746  
747  
748  
749  
750  
751  
752  
753  
754  
755  
756  
757  
758  
759  
760  
761  
762  
763  
764  
765  
766  
767  
768  
769  
770  
771  
772  
773  
774  
775  
776  
777  
778  
779  
780  
781  
782  
783  
784  
785  
786  
787  
788  
789  
790  
791  
792  
793  
794  
795  
796  
797  
798  
799  
800  
801  
802  
803  
804  
805  
806  
807  
808  
809  
810  
811  
812  
813  
814  
815  
816  
817  
818  
819  
820  
821  
822  
823  
824  
825  
826  
827  
828  
829  
830  
831  
832  
833  
834  
835  
836  
837  
838  
839  
840  
841  
842  
843  
844  
845  
846  
847  
848  
849  
850  
851  
852  
853  
854  
855  
856  
857  
858  
859  
860  
861  
862  
863  
864  
865  
866  
867  
868  
869  
870  
871  
872  
873  
874  
875  
876  
877  
878  
879  
880  
881  
882  
883  
884  
885  
886  
887  
888  
889  
890  
891  
892  
893  
894  
895  
896  
897  
898  
899  
900  
901  
902  
903  
904  
905  
906  
907  
908  
909  
910  
911  
912  
913  
914  
915  
916  
917  
918  
919  
920  
921  
922  
923  
924  
925  
926  
927  
928  
929  
930  
931  
932  
933  
934  
935  
936  
937  
938  
939  
940  
941  
942  
943  
944  
945  
946  
947  
948  
949  
950  
951  
952  
953  
954  
955  
956  
957  
958  
959  
960  
961  
962  
963  
964  
965  
966  
967  
968  
969  
970  
971  
972  
973  
974  
975  
976  
977  
978  
979  
980  
981  
982  
983  
984  
985  
986  
987  
988  
989  
990  
991  
992  
993  
994  
995  
996  
997  
998  
999  
1000

Maternal prenatal depression is known to have negative impacts on pregnancy, maternal postnatal mental health and neonatal outcomes [33, 34], and psychosocial predictors of maternal postpartum depression are well known [35, 36]. However, less well known is whether mothers and fathers in partnered, cohabitating couples (e.g. married, common-law) share common predictors and experiences of depressive symptoms in the perinatal period. Further, whether maternal prenatal nutrition impacts postpartum depressive symptoms is less well studied. Thus,

1  
2  
3 using APrON data, Leung and colleagues [32] reported on the prevalence of depressive  
4 symptoms in couples. For partnered mothers' depressive symptoms, using the recommended  
5 Edinburgh Depression Scale (EDS) cut-off score of  $\geq 10$  [37], findings revealed that 15.2% and  
6 11.18% of mothers had significant symptoms prenatally and at 3 months postpartum,  
7 respectively. For fathers in couples, the cut-off of EDS  $\geq 9$  was used as per recommendations  
8 [38] revealing that 14.0% and 12.1% of fathers had significant symptoms prenatally and at 3  
9 months postpartum, respectively. These rates are consistent with other large samples [39, 40].  
10 Further, 2.3% of couples experienced perinatal depressive symptoms in both mothers and fathers,  
11 78.5% of couples did not experience depressive symptoms in either partner, 9.5% of couples  
12 experienced depressive symptoms in mothers only, and 9.8% of couples experienced depressive  
13 symptoms in fathers only. Leung and colleagues [30] also determined the predictors of  
14 depression at 3 months postpartum from second trimester data. Risk factors for maternal  
15 postpartum depressive symptoms included low household income, high prenatal depressive  
16 symptoms, low postnatal support from fathers, and high stressful life events. Risk factors for  
17 paternal postpartum depressive symptoms included low household income, prenatal depressive  
18 symptoms, postpartum stressful life events, and smoking. For couples in which both partners  
19 were depressed, risk factors included low income, high maternal depressive symptoms and low  
20 prenatal social support from fathers. Postpartum social support was found to be a protective  
21 factor associated with decreased risk of maternal and paternal postpartum depressive symptoms.  
22  
23  
24  
25  
26  
27  
28  
29  
30  
31  
32  
33  
34  
35  
36  
37  
38  
39  
40  
41  
42  
43  
44  
45

46  
47 Additionally, Leung and colleagues [30] also examined nutritional predictors of maternal  
48 postpartum depression, focusing on APrON mothers' reports of their multivitamin and mineral  
49 intake in each trimester of pregnancy. Almost all women (99%) took some type of micronutrient  
50 supplement during the prenatal period, with the most commonly consumed being vitamins B6,  
51 B9 (folate), B12, and E, with more than 90% of mothers consuming above recommended dietary  
52  
53  
54  
55  
56  
57  
58  
59  
60

allowances. With respect to predictors of postpartum depression, findings revealed that mothers who experienced postpartum depressive symptoms ( $EDS \geq 10$ ) were statistically more likely to take the supplemental micronutrients selenium and omega-3, compared to mothers who reported no postpartum depressive symptoms ( $EDS < 10$ ). Selenium intake above the recommended dietary allowance appeared to be protective, and other research suggests that this micronutrient has a role in normal brain function and in the pathway between dopamine and the pathophysiology of depression [41]. The supplement taken the least was omega-3; however, 68.5% of women with low depressive symptoms ( $EDS < 10$ ) did not take omega-3, versus 78.0% of women with high depressive symptoms ( $EDS \geq 10$ ), a finding consistent with other research [42]. The mean intakes of other nutrients were more likely to be higher in women with low depressive symptoms than those with high symptoms, although not statistically significant. The authors conclude with a call for more study into the value of selenium and omega-3 in the prevention of postpartum depression.

### **Associations with adverse childhood experiences**

Adverse childhood experiences are defined as a set of exposures to personal abuse, neglect and household dysfunction prior 18 years of age that includes physical, sexual, and emotional abuse, domestic violence, and parental mental illness, substance use, and incarceration [43]. A graded relationship has been repeatedly observed between the number of adversities experienced in childhood and later increased risk for poor health, including depression [44, 45]; however whether such adversities affect perinatal mood more broadly including anxiety was less studied. Felitti and colleagues' [43] classic measure of adverse childhood experiences was administered to APrON mothers, revealing that while 55% reported none or one early adversity, 31% reported one or two adversities and nearly 14% reported three or more adverse childhood experiences. Employing data from each trimester of pregnancy and 3, 6 and 12 months

1  
2  
3 postpartum, more reported early adversities predicted higher reported symptoms of prenatal and  
4  
5 postnatal depression and anxiety [31]. Routine screening for maternal childhood adversities may  
6  
7 facilitate early identification and preventative interventions for perinatal mood disorders  
8  
9 including depression and anxiety; however, this has been recently debated [46]. In sum, the  
10  
11 identified risks and protective factors provide opportunities for prevention of perinatal depression  
12  
13 and anxiety in mothers and fathers.  
14  
15

### 16 **Nutrition outcomes**

17  
18  
19 Gestational weight gain and dietary intake, especially perinatal nutrient intake and status  
20  
21 focused on vitamin D and choline were examined in eight key papers [47-54].  
22  
23

#### 24 **Gestational weight gain and dietary intake**

25  
26 Gestational weight gain over or below Health Canada's Gestational Weight Gain  
27  
28 Guidelines is associated with an increased risk of adverse outcomes for mother and infant [55].  
29  
30 The APrON cohort was the first to provide evidence that more than half of women gain more  
31  
32 than Health Canada's Guidelines, using prospectively collected body weights from across  
33  
34 pregnancy [47]. Since then, several studies have been completed with body weight or body  
35  
36 composition in pregnancy or postpartum as a main outcome. Analysis of the APrON data by  
37  
38 Jarman and colleagues [48] provided a clear picture indicating that approximately 70% of women  
39  
40 who become pregnant with a body mass index (BMI)  $> 25 \text{ kg/m}^2$  are likely to exceed gestational  
41  
42 weight gain guidelines, by about 19 weeks gestation. Women with excessive weight gain also  
43  
44 gain higher amounts of body fat and retain higher amounts of fat compared to women who gain  
45  
46 within the guidelines [49]. The detailed dietary intake information that was collected showed that  
47  
48 women who consumed a healthy diet pattern prior to pregnancy were less likely to develop  
49  
50 complications such as gestational hypertension [50]. An individualized approach to supportive  
51  
52 dietary counseling that considers pre-pregnancy BMI in addition to the woman's social and  
53  
54  
55  
56  
57  
58  
59  
60

1  
2  
3 financial context may be key to helping women meet national recommendations for both diet and  
4  
5 gestational weight gain in pregnancy [56].  
6

### 7 **Nutrient intake and status**

8  
9  
10 Vitamin D is critical for a healthy pregnancy and the major circulating form of vitamin D  
11  
12 is 25-hydroxyvitamin D (25(OH)D); thus, the total serum 25(OH)D level is currently considered  
13  
14 the best indicator of vitamin D supply [57]. Three studies that included APrON participants  
15  
16 examined the role of maternal vitamin D intake during pregnancy [51-53]. Aghajafari and  
17  
18 colleagues [52] reported that the median vitamin D intake from diet and supplements was 600  
19  
20 International Units (IU)/day during pregnancy, which was not sufficient to achieve a target  
21  
22 circulation of 25(OH)D concentration. When the 3-epimer (3-epi-25(OH)D<sub>3</sub>) was included in  
23  
24 the estimation of vitamin D status, the prevalence of vitamin D insufficiency (<75 nmol/L) was  
25  
26 lower (33.0 %) compared to when it was excluded (38.0 %). Vitamin D supplementation (2000  
27  
28 IU/day) was associated with 25(OH)D<sub>3</sub> sufficiency [51-53]. A significant relationship between  
29  
30 maternal reported dietary vitamin D intake and plasma 25(OH)D and 3-epi-25(OH)D<sub>3</sub>  
31  
32 concentration were identified.  
33  
34  
35  
36

37  
38 Choline intake during pregnancy and lactation is critical to the offspring's brain function  
39  
40 [58]. Lewis and colleagues [54] reported that the mean choline intake in pregnant and lactating  
41  
42 women ranged between 340 (SD 148) in the second trimester and 346 (SD 151) mg/day at 3  
43  
44 months postpartum. Only 23% of mothers met the adequate intake (AI) recommendations for  
45  
46 choline; the number was even lower (10%) in the postpartum period [54]. Consuming eggs and  
47  
48 milk during pregnancy increased mothers' likelihood of meeting choline AI recommendations.  
49  
50 These findings contributed to the European Food Safety Authority (EFSA) dietary reference  
51  
52 values for choline guidelines [59]. To conclude, a significant number of women were not meeting  
53  
54 recommendations for vitamin D and choline intake during pregnancy and postpartum. Increased  
55  
56  
57  
58  
59



1  
2  
3 consumption of these nutrients may be necessary for pregnant and lactating women to improve  
4  
5 the health and development of their infants.  
6

### 7 **Child outcomes**

8  
9  
10 The impacts of maternal and infant nutrient intake, maternal BMI and gestational weight  
11  
12 gain, and perinatal depression and maternal adverse childhood experiences on child outcomes  
13  
14 were examined in four key papers [31, 60-62]. Many more papers will emerge as the cohort  
15  
16 matures and data become available.  
17

#### 18 **Maternal BMI, gestational weight gain and vitamin D**

19  
20  
21 Subhan and colleagues [60] described the effects of maternal pre-pregnancy BMI and  
22  
23 gestational weight gain on infant anthropometrics at birth and three months and infant growth  
24  
25 rates between birth and three months. Other research shows that children who are heavier at birth  
26  
27 have an increased risk of high BMI in childhood, being overweight or obese as adults [63, 64], a  
28  
29 condition linked increased risk for hypertension, type 2 diabetes and cardiovascular diseases [63,  
30  
31 65]. APrON findings revealed that infants with higher weight at birth and at 3 months of age had  
32  
33 mothers with a higher pre-pregnancy BMI. Also gestational weight gain above recommendations  
34  
35 was associated with higher infant weight at birth and three months of age as well as more rapid  
36  
37 postnatal growth. The authors concluded that clinicians and health care professionals should  
38  
39 encourage women to enter pregnancy with a healthy BMI and adhere to the current gestational  
40  
41 weight gain recommendations. Aghajafari and colleagues [61] examined the association between  
42  
43 APrON mothers' vitamin D intake during breastfeeding with their infants' vitamin D status to  
44  
45 determine whether infant supplementation was sufficient. Other research reveals that low vitamin  
46  
47 D is associated with increased rates of infections, autoimmunity and allergies [66] and poor bone  
48  
49 health in children [67]. Using plasma from a subset of breastfed infants, vitamin D status was  
50  
51 measured by liquid chromatography-tandem mass spectrometry and maternal and infants' dietary  
52  
53  
54  
55  
56  
57  
58  
59  
60

1  
2  
3 data were attained from dietary questionnaires. Controlling for race, season, prenatal maternal  
4 vitamin D status, infant birth weight, and daily infant vitamin D supplementation, infants vitamin  
5 D status increased in direct proportion to mothers' vitamin D intake. Moreover, a quarter of  
6  
7  
8  
9  
10 mothers were below recommended AI for vitamin D. The authors concluded that to ensure  
11  
12 optimal infant vitamin D status, both infants and breastfeeding mothers require vitamin D  
13  
14 supplementation.  
15

### 16 **Perinatal depression and adverse childhood experiences**

17  
18  
19 Two studies addressed impacts of perinatal depression and adverse childhood experiences  
20  
21 on children's behaviour. It is well established that children's internalizing behavioural problems  
22  
23 (e.g. emotional reactivity, anxiety, depression, somatic complaints, and social withdrawal) and  
24  
25 externalizing behavioral problems (i.e. inattention, hyperactivity and aggression) predict adult  
26  
27 mental health problems [68-70]. As indicated above, adverse childhood experiences increased  
28  
29 risk for poor health over the lifespan [71-73]; however intergenerational impacts have also been  
30  
31 noted [74, 75] with an incomplete understanding of the mechanism of transmission from one  
32  
33 generation to the next [31]. In examining intergenerational impacts, Letourneau and colleagues<sup>31</sup>  
34  
35 found that APrON mothers' experiences of early adversity were associated with maternal  
36  
37 symptoms of anxiety and depression during the perinatal period (discussed earlier) as well as  
38  
39 externalizing behavioral problems in their 2-year old children. Indirect associations were  
40  
41 observed between maternal adverse childhood experiences and children's internalizing and  
42  
43 externalizing problems via maternal anxiety and depression. Sex differences were also observed  
44  
45 with boys demonstrating greater vulnerability to the indirect effects of maternal adversity via  
46  
47 both depression and anxiety. The authors concluded that interventions may be targeted to women  
48  
49 who have multiple adverse childhood experiences as well as mental health problems to prevent  
50  
51 behavioral problems in their children. Letourneau and colleagues [62] further examined perinatal  
52  
53  
54  
55  
56  
57  
58  
59  
60

depression in mothers, as well as fathers or both parents and how symptoms in one or both parents predict children's behavioral problems. Other research has shown that fathers may buffer the impacts of maternal depression on children's outcomes and thus this protective factor is likely undermined when fathers are depressed as well as mothers [34, 76]. Mothers' and fathers' depressive symptoms were measured during pregnancy and three months postpartum, and children's behavior was measured at 24 and 36 months of age. Results revealed that both mothers' perinatal depressive symptoms and mothers' and fathers' co-occurring perinatal depressive symptoms predicted more problematic emotionally reactive, withdrawn, and total internalizing behaviors. In contrast, children's aggression, attention problems and total externalizing behaviors were only predicted by mothers' perinatal depressive symptoms. The authors urge health care providers to consider the whole family, including fathers, when treating maternal symptoms of depression, aligned with review recommendations to also consider fathers [34, 77].

### **What are the main strengths and weaknesses?**

The major strengths of APrON are recruitment and retention of the large community-based cohort during pregnancy, postpartum and early childhood. The APrON study used a detailed array of standardized validated psychological and physiological measures and biospecimens. The prospective data collection and follow-up enabled investigation of a wide range of maternal and paternal health outcomes. The APrON team has been successful in continuously engaging participants, as evidenced by high response rates over the years (see Table 4).

Table 4. *Response Rates for Questionnaires*

| <b>Data collection time point</b> | Targeted participants (n) | Participants responded (n) | Response rate (%) |
|-----------------------------------|---------------------------|----------------------------|-------------------|
|                                   | 2189                      | 2145                       | 97.9              |

---

|                                                                              |      |      |      |
|------------------------------------------------------------------------------|------|------|------|
| Mothers < 14 weeks gestation                                                 |      |      |      |
| Mothers at 14-26 weeks gestation                                             |      |      |      |
| Mothers at 14-26 weeks gestation and those recruited at < 14 weeks gestation | 563  | 475  | 84.3 |
| Fathers at 14-26 weeks gestation                                             | 1325 | 1315 | 99.2 |
| Mothers at 27-40 weeks gestation                                             | 1838 | 1830 | 99.5 |
| Mothers at 3 months postpartum                                               | 2051 | 1811 | 88.3 |
| Fathers at 3 months postpartum                                               | 1287 | 1150 | 89.3 |
| Mothers at 6 months postpartum                                               | 1727 | 1523 | 88.1 |
| Mothers at 1 year postpartum                                                 | 1747 | 1305 | 74.7 |
| Mothers at 2 years postpartum                                                | 1809 | 1299 | 71.8 |
| Mothers at 3 years postpartum                                                | 1648 | 1282 | 77.7 |

---

The high response rates over time may be due to the recruitment of a relatively low-risk sample as sociodemographic characteristics are skewed toward a high percentage of well-educated, higher income, married participants. Consequently, generalizability of findings to those with different sociodemographic backgrounds should be made with caution. Further, the study likely included participants with healthier lifestyle behaviors or with more positive attitudes towards research, because such characteristics are associated with higher socioeconomic status [78]. Selective attrition bias is likely operating in the cohort, which may lead to underestimation of the effect of parental mental health and lifestyle choices on children's development. While

1  
2  
3 attrition has been relatively low over time, differences in the sociodemographic characteristics of  
4  
5 the continuing participants compared with discontinuing participants should be considered when  
6  
7 interpreting the findings. There were also fewer fathers than mothers in the sample; thus, most  
8  
9 developmental and behavioral outcomes are based on maternal reports.  
10

### 11 **Where can I find out more about APrON research?**

12  
13  
14 Information about the APrON study is available at [www.apronstudy.ca](http://www.apronstudy.ca). APrON data are  
15  
16 available through SAGE (Secondary Evidence to Generate Evidence;  
17  
18 <https://policywise.com/sage/>). For more information contact Dr. Nicole Letourneau at  
19  
20 [Nicole.letourneau@ucalgary.ca](mailto:Nicole.letourneau@ucalgary.ca). Collaboration or data access inquiries will be considered by the  
21  
22 APrON Study team.  
23  
24  
25

#### 26 Profile in a nutshell

- 27 • The APrON study is a longitudinal cohort of mothers, fathers and their children investigating maternal,  
28 parental, birth, and child development outcomes.
- 29 • A total of 2189 women (aged 16 to 44) and 1325 fathers (aged 18 to 52), residing around either Calgary or  
30 Edmonton, Alberta, enrolled and completed at least one questionnaire between May 2009 and June 2012.  
31 The majority were married, educated, had annual household incomes >\$70 000 and were born in Canada.
- 32 • Mothers completed 18 questionnaires and up to 4 clinic visits spanning pregnancy to eight years postpartum  
33 and provided access to their medical records as well as three to four blood and two urine samples. To date,  
34 1648 mothers and 1255 fathers remain eligible for follow-up.
- 35 • The APrON dataset includes comprehensive maternal and child sociodemographic data, maternal nutrition  
36 and psychological data from pregnancy to eight years postpartum, and infant and child neurodevelopmental  
37 and behavioural data to eight years of age. Maternal, paternal and infant biosamples for genetics were also  
38 collected. Five and 8-year data collection is complete and 12-year data follow-up will start in 2022.

39  
40  
41 Requests for data and collaboration are welcomed, contact Dr. Nicole Letourneau at  
42 [nicole.letourneau@ucalgary.ca](mailto:nicole.letourneau@ucalgary.ca)  
43  
44  
45

### 46 **Figure Legends**

- 47  
48  
49 • *Figure 1.* Socio-demographic characteristics of women in APrON, Calgary, Alberta,  
50 Canada.
- 51  
52  
53 • *Figure 2.* Data collection to 8 years of child age  
54

### 55 **Contributorship Statement**

1  
2  
3 Nicole Letourneau (NL) conceived of the idea for the paper, oversees all aspects of the APrON  
4 cohort, including the collection, cleaning and analysis of data for reviewed studies, and wrote  
5 major sections of the paper, approved the final version of the paper to be published, and agreed to  
6 be accountable for all aspects of the work.  
7  
8  
9  
10

11  
12  
13 Elena Ali (EA) wrote the initial draft of the paper with support from NL, GG, FA, RB, and DD,  
14 approved of the final version of the paper to be published, and agreed to be accountable for all  
15 aspects of the work.  
16  
17  
18

19  
20  
21 Fariba Aghajafari (FA) contributed to the collection, cleaning and analysis of data for reviewed  
22 studies, critically reviewed the drafts, approved the final version of the paper to be published, and  
23 agreed to be accountable for all aspects of the work.  
24  
25  
26

27  
28 Rhonda Bell (RB) wrote a key section of the paper, contributed to the collection, cleaning and  
29 analysis of data for reviewed studies, critically reviewed the drafts, approved the final version of  
30 the paper to be published and agreed to be accountable for all aspects of the work.  
31  
32  
33

34  
35  
36 Andrea J. Deane (AJD) contributed to the collection, cleaning and analysis of data for reviewed  
37 studies, critically reviewed the drafts, approved of the final version of the paper to be published,  
38 and agreed to be accountable for all aspects of the work.  
39  
40  
41

42  
43  
44 Deborah Dewey (DD) contributed to the collection, cleaning and analysis of data for reviewed  
45 studies, critically reviewed the drafts, approved the final version of the paper to be published, and  
46 agreed to be accountable for all aspects of the work.  
47  
48  
49

50  
51  
52 Catherine Field (CF) contributed to the collection, cleaning and analysis of data for reviewed  
53 studies, critically reviewed the drafts, approved the final version of the paper to be published, and  
54 agreed to be accountable for all aspects of the work.  
55  
56  
57  
58  
59  
60

1  
2  
3 Gerald Giesbrecht (GG) contributed to the collection, cleaning and analysis of data for reviewed  
4 studies, critically reviewed the drafts, approved the final version of the paper to be published, and  
5 agreed to be accountable for all aspects of the work.  
6  
7

8  
9  
10 Bonnie Kaplan (BK) contributed to the collection, cleaning and analysis of data for reviewed  
11 studies, critically reviewed the drafts, approved the final version of the paper to be published, and  
12 agreed to be accountable for all aspects of the work.  
13  
14

15  
16  
17 Brenda Leung (BL) contributed to the collection, cleaning and analysis of data for reviewed  
18 studies, critically reviewed the drafts, approved the final version of the paper to be published, and  
19 agreed to be accountable for all aspects of the work.  
20  
21  
22

23  
24  
25 Henry Ntanda (HN) contributed to the cleaning and analysis of data for reviewed studies,  
26 critically reviewed the drafts, approved the final version of the paper to be published, and agreed  
27 to be accountable for all aspects of the work.  
28  
29  
30

31  
32  
33 APrON Study Cohort Participants volunteered time and energy to share their individual and  
34 family's experiences with us to help improve the long-term health outcomes for future newborns,  
35 mother, fathers, and families.  
36  
37  
38

### 39 40 41 **Competing Interest**

42  
43 None declared.  
44

### 45 46 **Funding Statement**

47  
48 This work was supported by the Alberta Children's Hospital Foundation (grant/award number  
49 N/A), Alberta Innovates Health Solutions Foundation (grant/award number N/A), Canadian  
50 Institutes for Health Research (Operating Grants), Canadian Institutes for Health Research (CIHR)  
51  
52  
53  
54  
55  
56  
57  
58  
59  
60

1  
2  
3 Doctoral Award, grant number 394652), Kids Brain Health Network (grant/award number N/A),  
4  
5 and the National Centre of Excellence: Allergen (grant/award number N/A).  
6

### 7 **Data Sharing Statement**

8  
9 Data may be obtained from a third party and are not publicly available and data are available  
10  
11 upon reasonable request. Accordingly, data can be collected at the Secondary Analysis to General  
12  
13 Evidence (SAGE) data repository or by contacting Dr. Nicole Letourneau (the principal  
14  
15 investigator for the APrON study).  
16  
17  
18  
19  
20  
21  
22  
23  
24  
25  
26  
27  
28  
29  
30  
31  
32  
33  
34  
35  
36  
37  
38  
39  
40  
41  
42  
43  
44  
45  
46  
47  
48  
49  
50  
51  
52  
53  
54  
55  
56  
57  
58  
59  
60



## References

1. Leung, B.M., et al., *Perinatal nutrition in maternal mental health and child development: Birth of a pregnancy cohort*. Early Hum Dev, 2016. **93**: p. 1-7.
2. Kaplan, B.J., et al., *The Alberta Pregnancy Outcomes and Nutrition (APrON) cohort study: rationale and methods*. Matern Child Nutr, 2014. **10**(1): p. 44-60.
3. Manca, D.P., et al., *The most effective strategy for recruiting a pregnancy cohort: a tale of two cities*. BMC pregnancy and childbirth, 2013. **13**(1): p. 1-7.
4. Kaplan, B.J., et al., *The Alberta Pregnancy Outcomes and Nutrition (APrON) cohort study: rationale and methods*. Maternal & child nutrition, 2014. **10**(1): p. 44-60.
5. Manca, D.P., et al., *The most effective strategy for recruiting a pregnancy cohort: a tale of two cities*. BMC Pregnancy Childbirth, 2013. **13**: p. 75.
6. Leung, B.M., et al., *Comparison of sample characteristics in two pregnancy cohorts: community-based versus population-based recruitment methods*. BMC Med Res Methodol, 2013. **13**: p. 149.
7. Leung, B.M., et al., *Perinatal nutrition in maternal mental health and child development: Birth of a pregnancy cohort*. Early human development, 2016. **93**: p. 1-7.
8. Dzakpasu, S., et al., *The Canadian maternity experiences survey: design and methods*. J Obstet Gynaecol Can, 2008. **30**(3): p. 207-216.
9. Tough, S.C., et al., *Cohort Profile: The All Our Babies pregnancy cohort (AOB)*. Int J Epidemiol, 2017. **46**(5): p. 1389-1390k.
10. England-Mason, G., et al., *Postnatal BPA is associated with increasing executive function difficulties in preschool children*. Pediatric research, 2020: p. 1-8.

11. Liu, J., et al., *Exposure and dietary sources of bisphenol A (BPA) and BPA-alternatives among mothers in the APrON cohort study*. *Environment international*, 2018. **119**: p. 319-326.
12. Giesbrecht, G.F., et al., *Prenatal bisphenol a exposure and dysregulation of infant hypothalamic-pituitary-adrenal axis function: findings from the APrON cohort study*. *Environmental Health*, 2017. **16**(1): p. 1-11.
13. Giesbrecht, G.F., et al., *Urinary bisphenol A is associated with dysregulation of HPA-axis function in pregnant women: Findings from the APrON cohort study*. *Environmental research*, 2016. **151**: p. 689-697.
14. Liu, J., et al., *Interaction of prenatal bisphenols, maternal nutrients, and toxic metal exposures on neurodevelopment of 2-year-olds in the APrON cohort*. *Environment International*, 2021. **155**: p. 106601.
15. Grohs, M.N., et al., *Prenatal maternal and childhood bisphenol a exposure and brain structure and behavior of young children*. *Environmental Health*, 2019. **18**(1): p. 1-12.
16. Letourneau, N.L., et al., *Parenting Interacts With Plasticity Genes in Predicting Behavioral Outcomes in Preschoolers*. *Canadian Journal of Nursing Research*, 2019: p. 0844562119863612.
17. Merrill, S.M., et al., *Associations of peripheral blood DNA methylation and estimated monocyte proportion differences during infancy with toddler attachment style*. *Attachment & Human Development*, 2021: p. 1-30.
18. Merrill, S.M., et al., *Paternal adverse childhood experiences: Associations with infant DNA methylation*. *Developmental Psychobiology*, 2021.
19. Letourneau, N., et al., *Prenatal maternal distress and immune cell epigenetic profiles at 3-months of age*. *Developmental Psychobiology*, 2021.

- 1  
2  
3 20. Letourneau, N.L., et al., *Maternal sensitivity and social support protect against childhood*  
4 *atopic dermatitis*. Allergy, Asthma & Clinical Immunology, 2017. **13**(1): p. 1-14.  
5  
6  
7 21. Giesbrecht, G., et al., *Advancing gestation does not attenuate biobehavioural coherence*  
8 *between psychological distress and cortisol*. Biological psychiatry, 2013. **93**(1): p. 45-51.  
9  
10 22. Giesbrecht, G., et al., *The buffering effect of social support on HPA axis function during*  
11 *pregnancy*. Psychosomatic medicine, 2013. **75**(9): p. 856-862.  
12  
13 23. Giesbrecht, G., et al., *Sexually dimorphic adaptations in basal maternal stress physiology*  
14 *during pregnancy and implications for fetal development*. Psychoneuroendocrinology,  
15 2015. **56**: p. 168-178.  
16  
17 24. Giesbrecht, G.F., et al., *The buffering effect of social support on hypothalamic-pituitary-*  
18 *adrenal axis function during pregnancy*. Psychosomatic medicine, 2013. **75**(9): p. 856-  
19 862.  
20  
21 25. Thomas-Argyriou, J.C., et al., *The role of HPA-axis function during pregnancy in the*  
22 *intergenerational transmission of maternal adverse childhood experiences to child*  
23 *behavior problems*. Development and Psychopathology, 2020: p. 1-17.  
24  
25 26. Giesbrecht, G.F., et al., *Psychological distress and salivary cortisol covary within persons*  
26 *during pregnancy*. Psychoneuroendocrinology, 2012. **37**(2): p. 270-279.  
27  
28 27. Thomas, J.C., et al., *Biological embedding of perinatal social relationships in infant*  
29 *stress reactivity*. Developmental psychobiology, 2017. **59**(4): p. 425-435.  
30  
31 28. Rash, J.A., et al., *Maternal cortisol during pregnancy is related to infant cardiac vagal*  
32 *control*. Psychoneuroendocrinology, 2015. **54**: p. 78-89.  
33  
34 29. Thomas, J.C., et al., *Developmental origins of infant emotion regulation: Mediation by*  
35 *temperamental negativity and moderation by maternal sensitivity*. Developmental  
36 Psychology, 2017. **53**(4): p. 611.  
37  
38  
39  
40  
41  
42  
43  
44  
45  
46  
47  
48  
49  
50  
51  
52  
53  
54  
55  
56  
57  
58  
59  
60

- 1  
2  
3 30. Leung, B.M., et al., *Prenatal micronutrient supplementation and postpartum depressive*  
4 *symptoms in a pregnancy cohort*. BMC Pregnancy Childbirth, 2013. **13**: p. 2.  
5  
6  
7 31. Letourneau, N., et al., *Intergenerational transmission of adverse childhood experiences*  
8 *via maternal depression and anxiety and moderation by child sex*. Journal of  
9 *developmental origins of health and disease*, 2019. **10**(1): p. 88-99.  
10  
11  
12 32. Leung, B.M., et al., *Predictors of postpartum depression in partnered mothers and fathers*  
13 *from a longitudinal cohort*. Community mental health journal, 2017. **53**(4): p. 420-431.  
14  
15  
16 33. Field, T., et al., *Comorbid depression and anxiety effects on pregnancy and neonatal*  
17 *outcome*. Infant Behavior and Development, 2010. **33**(1): p. 23-29.  
18  
19  
20 34. Letourneau, N.L., L. Tramonte, and J.D. Willms, *Maternal depression, family functioning*  
21 *and children's longitudinal development*. Journal of pediatric nursing, 2013. **28**(3): p. 223-  
22 234.  
23  
24  
25 35. Yim, I.S., et al., *Biological and psychosocial predictors of postpartum depression:*  
26 *systematic review and call for integration*. Annual review of clinical psychology, 2015.  
27 **11**: p. 99-137.  
28  
29  
30 36. Guintivano, J., T. Manuck, and S. Meltzer-Brody, *Predictors of postpartum depression: a*  
31 *comprehensive review of the last decade of evidence*. Clinical obstetrics and gynecology,  
32 2018. **61**(3): p. 591.  
33  
34  
35 37. Bergink, V., et al., *Validation of the Edinburgh Depression Scale during pregnancy*.  
36 *Journal of Psychosomatic Research*, 2011. **70**: p. 385-389.  
37  
38  
39 38. Paulson, J.F. and S.D. Bazemore, *Prenatal and Postpartum Depression in Fathers and Its*  
40 *Association With Maternal Depression*. JAMA, 2010. **303**(19): p. 1961-1969.  
41  
42  
43 39. Gavin, N.I., et al., *Perinatal depression: a systematic review of prevalence and incidence*.  
44 *Obstetrics & Gynecology*, 2005. **106**(5 Part 1): p. 1071-1083.  
45  
46  
47  
48  
49  
50  
51  
52  
53  
54  
55  
56  
57  
58  
59  
60

- 1  
2  
3 40. Carlberg, M., M. Edhborg, and L. Lindberg, *Paternal perinatal depression assessed by*  
4 *the Edinburgh Postnatal Depression Scale and the Gotland Male Depression Scale:*  
5 *Prevalence and possible risk factors.* American journal of men's health, 2018. **12**(4): p.  
6 720-729.  
7  
8  
9  
10  
11  
12 41. Pasco, J.A., et al., *Dietary selenium and major depression: a nested case-control study.*  
13 *Complementary therapies in medicine*, 2012. **20**(3): p. 119-123.  
14  
15  
16 42. Markhus, M.W., et al., *Low omega-3 index in pregnancy is a possible biological risk*  
17 *factor for postpartum depression.* PloS one, 2013. **8**(7): p. e67617.  
18  
19  
20  
21 43. Felitti, V.J., et al., *Relationship of childhood abuse and household dysfunction to many of*  
22 *the leading causes of death in adults. The Adverse Childhood Experiences (ACE) Study.*  
23 *Am J Prev Med*, 1998. **14**(4): p. 245-58.  
24  
25  
26  
27  
28 44. Danese, A., et al., *Adverse childhood experiences and adult risk factors for age-related*  
29 *disease: depression, inflammation, and clustering of metabolic risk markers.* Archives of  
30 *pediatrics & adolescent medicine*, 2009. **163**(12): p. 1135-1143.  
31  
32  
33  
34  
35 45. Hughes, K., et al., *The effect of multiple adverse childhood experiences on health: a*  
36 *systematic review and meta-analysis.* Lancet Public Health, 2017. **2**(8): p. e356-e366.  
37  
38  
39  
40 46. Hughes, K., et al., *The effect of multiple adverse childhood experiences on health: a*  
41 *systematic review and meta-analysis.* The Lancet Public Health, 2017. **2**(8): p. e356-e366.  
42  
43  
44  
45 47. Begum, F., et al., *Gestational weight gain and early postpartum weight retention in a*  
46 *prospective cohort of Alberta women.* J Obstet Gynaecol Can, 2012. **34**(7): p. 637-47.  
47  
48  
49 48. Jarman, M., et al., *Patterns and trajectories of gestational weight gain: a prospective*  
50 *cohort study.* CMAJ Open, 2016. **4**(2): p. E338-45.  
51  
52  
53  
54  
55  
56  
57  
58  
59  
60

- 1  
2  
3 49. Subhan, F.B., et al., *Association of pre-pregnancy BMI and gestational weight gain with*  
4 *fat mass distribution and accretion during pregnancy and early postpartum: a*  
5 *prospective study of Albertan women.* BMJ Open, 2019. **9**(7): p. e026908.  
6  
7  
8  
9  
10 50. Jarman, M., et al., *Dietary Patterns Prior to Pregnancy and Associations with Pregnancy*  
11 *Complications.* Nutrients, 2018. **10**(7).  
12  
13  
14 51. Aghajafari, F., et al., *Plasma 3-Epi-25-Hydroxycholecalciferol Can Alter the Assessment*  
15 *of Vitamin D Status Using the Current Reference Ranges for Pregnant Women and Their*  
16 *Newborns.* J Nutr, 2016. **146**(1): p. 70-5.  
17  
18  
19  
20  
21 52. Aghajafari, F., et al., *The Current Recommended Vitamin D Intake Guideline for Diet and*  
22 *Supplements During Pregnancy Is Not Adequate to Achieve Vitamin D Sufficiency for*  
23 *Most Pregnant Women.* PLoS One, 2016. **11**(7): p. e0157262.  
24  
25  
26  
27  
28 53. Aghajafari, F., et al., *The High Prevalence of Vitamin D Insufficiency in Cord Blood in*  
29 *Calgary, Alberta (APrON-D Study).* J Obstet Gynaecol Can, 2017. **39**(5): p. 347-353.e1.  
30  
31  
32  
33 54. Lewis, E.D., et al., *Estimation of choline intake from 24 h dietary intake recalls and*  
34 *contribution of egg and milk consumption to intake among pregnant and lactating women*  
35 *in Alberta.* Br J Nutr, 2014. **112**(1): p. 112-21.  
36  
37  
38  
39  
40 55. Government of Canada. *Prenatal Nutrition Guidelines for Health Professionals:*  
41 *Gestational Weight Gain.* 2010 [cited 2020 21 Jan]; Available from:  
42 [https://www.canada.ca/en/health-canada/services/canada-food-guide/resources/prenatal-](https://www.canada.ca/en/health-canada/services/canada-food-guide/resources/prenatal-nutrition/eating-well-being-active-towards-healthy-weight-gain-pregnancy-2010.html)  
43 [nutrition/eating-well-being-active-towards-healthy-weight-gain-pregnancy-2010.html](https://www.canada.ca/en/health-canada/services/canada-food-guide/resources/prenatal-nutrition/eating-well-being-active-towards-healthy-weight-gain-pregnancy-2010.html).  
44  
45  
46  
47  
48  
49 56. APrON and ENRICH Study Teams, *Adherence to Canada's Food Guide*  
50 *Recommendations during Pregnancy: Nutritional Epidemiology and Public Health.* Curr  
51 *Dev Nutr,* 2017. **1**(7): p. e000356.  
52  
53  
54  
55  
56  
57  
58  
59  
60

- 1  
2  
3 57. Aghajafari, F., et al., *Association between maternal serum 25-hydroxyvitamin D level and*  
4 *pregnancy and neonatal outcomes: systematic review and meta-analysis of observational*  
5 *studies*. *Bmj*, 2013. **346**: p. f1169.  
6  
7  
8  
9  
10 58. Wallace, T.C., et al., *Choline: The Neurocognitive Essential Nutrient of Interest to*  
11 *Obstetricians and Gynecologists*. *J Diet Suppl*, 2019: p. 1-20.  
12  
13  
14 59. European Food Safety Authority, *Dietary reference values: EFSA publishes advice on*  
15 *choline*. 2016. p. 1-70.  
16  
17  
18  
19 60. Subhan, F.B., et al., *Higher pre-pregnancy BMI and excessive gestational weight gain are*  
20 *risk factors for rapid weight gain in infants*. *Maternal and child health journal*, 2017.  
21  
22 **21**(6): p. 1396-1407.  
23  
24  
25  
26 61. Aghajafari, F., et al., *Both mother and infant require a vitamin D supplement to ensure*  
27 *that infants' vitamin D status meets current guidelines*. *Nutrients*, 2018. **10**(4): p. 429.  
28  
29  
30  
31 62. Letourneau, N., et al., *Maternal and paternal perinatal depressive symptoms associate*  
32 *with 2- and 3-year-old children's behaviour: findings from the APrON longitudinal study*.  
33 *BMC Pediatr*, 2019. **19**(1): p. 435.  
34  
35  
36  
37 63. Sommer, A. and G. Twig, *The impact of childhood and adolescent obesity on*  
38 *cardiovascular risk in adulthood: a systematic review*. *Current diabetes reports*, 2018.  
39  
40 **18**(10): p. 1-6.  
41  
42  
43  
44 64. Sacco, M., et al., *Birth weight, rapid weight gain in infancy and markers of overweight*  
45 *and obesity in childhood*. *European journal of clinical nutrition*, 2013. **67**(11): p. 1147-  
46 1153.  
47  
48  
49  
50  
51 65. Ghoorah, K., et al., *Obesity and cardiovascular outcomes: a review*. *European Heart*  
52 *Journal: Acute Cardiovascular Care*, 2016. **5**(1): p. 77-85.  
53  
54  
55  
56  
57  
58  
59  
60

- 1  
2  
3 66. Mailhot, G. and J.H. White, *Vitamin D and immunity in infants and children*. *Nutrients*,  
4 2020. **12**(5): p. 1233.  
5  
6  
7 67. Arman, S., *What are the effects of vitamin D supplementation for term breastfed infants to*  
8 *prevent vitamin D deficiency and improve bone health?-A Cochrane Review summary*  
9 *with commentary*. *Journal of Musculoskeletal & Neuronal Interactions*, 2021. **21**(2): p.  
10 193.  
11  
12 68. Aronen, E.T. and M. Soininen, *Childhood depressive symptoms predict psychiatric*  
13 *problems in young adults*. *The Canadian Journal of Psychiatry*, 2000. **45**(5): p. 465-470.  
14  
15 69. Benjet, C., et al., *Incidence and recurrence of depression from adolescence to early*  
16 *adulthood: A longitudinal follow-up of the mexican adolescent mental health survey*.  
17 *Journal of affective disorders*, 2020. **263**: p. 540-546.  
18  
19 70. Copeland, W.E., et al., *Childhood and adolescent psychiatric disorders as predictors of*  
20 *young adult disorders*. *Archives of general psychiatry*, 2009. **66**(7): p. 764-772.  
21  
22 71. Hege, A., et al., *Adverse childhood experiences among adults in North Carolina, USA:*  
23 *influences on risk factors for poor health across the lifespan and intergenerational*  
24 *implications*. *International journal of environmental research and public health*, 2020.  
25 **17**(22): p. 8548.  
26  
27 72. Sheffler, J.L., I. Stanley, and N. Sachs-Ericsson, *ACEs and mental health outcomes*, in  
28 *Adverse childhood experiences*. 2020, Elsevier. p. 47-69.  
29  
30 73. Vig, K.D., M.M. Paluszek, and G.J. Asmundson, *ACEs and physical health outcomes*, in  
31 *Adverse Childhood Experiences*. 2020, Elsevier. p. 71-90.  
32  
33 74. McDonald, S., et al., *Maternal adverse childhood experiences, mental health, and child*  
34 *behaviour at age 3: The all our families community cohort study*. *Preventive medicine*,  
35 2019. **118**: p. 286-294.  
36  
37  
38  
39  
40  
41  
42  
43  
44  
45  
46  
47  
48  
49  
50  
51  
52  
53  
54  
55  
56  
57  
58  
59  
60



- 1  
2  
3 75. Racine, N., et al., *Maternal adverse childhood experiences and infant development*.  
4  
5 Pediatrics, 2018. **141**(4).  
6  
7  
8 76. Letourneau, N., L. Duffett-Leger, and M. Salmani, *The role of paternal support in the*  
9  
10 *behavioural development of children exposed to postpartum depression*. Canadian Journal  
11  
12 of Nursing Research, 2009. **41**(3): p. 86-106.  
13  
14  
15 77. Rao, W.-W., et al., *Prevalence of prenatal and postpartum depression in fathers: A*  
16  
17 *comprehensive meta-analysis of observational surveys*. Journal of affective disorders,  
18  
19 2020. **263**: p. 491-499.  
20  
21  
22 78. Daniels, J.L., et al., *Attitudes toward participation in a pregnancy and child cohort study*.  
23  
24 *Paediatr Perinat Epidemiol*, 2006. **20**(3): p. 260-6.  
25  
26  
27  
28  
29  
30  
31  
32  
33  
34  
35  
36  
37  
38  
39  
40  
41  
42  
43  
44  
45  
46  
47  
48  
49  
50  
51  
52  
53  
54  
55  
56  
57  
58  
59  
60

1  
2  
3  
4  
5  
6  
7  
8  
9  
10  
11  
12  
13  
14  
15  
16  
17  
18  
19  
20  
21  
22  
23  
24  
25  
26  
27  
28  
29  
30  
31  
32  
33  
34  
35  
36  
37  
38  
39  
40  
41  
42  
43  
44  
45  
46  
47  
48  
49  
50  
51  
52  
53  
54  
55  
56  
57  
58  
59  
60

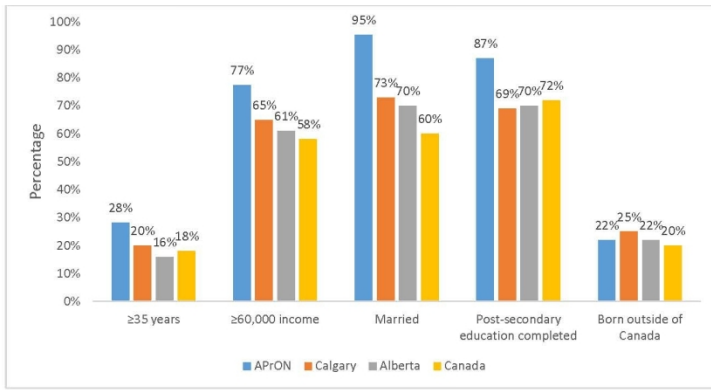

Figure 1. Sociodemographic characteristics of women in APrON, Calgary, Alberta, and Canada.

Sociodemographic characteristics of women in APrON, Calgary, Alberta, and Canada  
215x279mm (200 x 200 DPI)

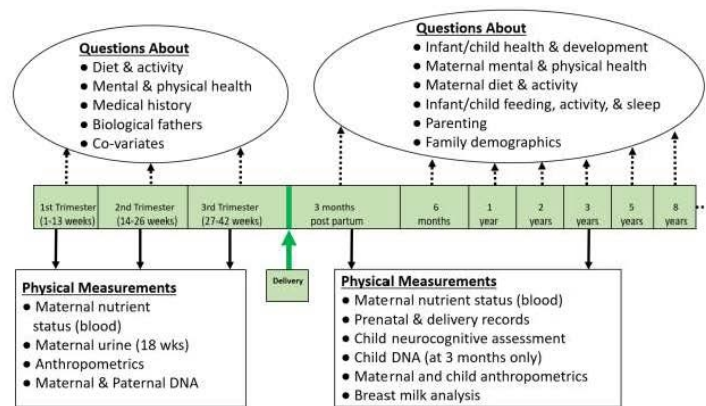

Figure 2. Data collection to 8 years of child age

Data collection to 8 years of child age

215x279mm (96 x 96 DPI)
